# Supplementary material
Source: PubMed Central journal article supplement (PMC4359053)

# Supporting Information

## Design, Synthesis and Biological Evaluation of Theranostic Vitamin-Linker-Taxoid Conjugates

Jacob G. Vineberg<sup>†</sup>, Tao Wang<sup>†</sup>, Edison S. Zuniga<sup>†</sup>, Iwao Ojima<sup>†,‡,\*1</sup>

<sup>†</sup>*Department of Chemistry, Stony Brook University, Stony Brook, NY 11794-3400*

<sup>‡</sup>*Institute of Chemical Biology & Drug Discovery, Stony Brook University, Stony Brook, NY 11794-3400*

---

To whom correspondence should be addressed:

Email: [iwao.ojima@stonybrook.edu](mailto:iwao.ojima@stonybrook.edu)

## Table of Contents

|                                                                                                                                                                        | Page Number |
|------------------------------------------------------------------------------------------------------------------------------------------------------------------------|-------------|
| Assessment of non-specific internalization of probe <b>6</b> in L1210FR, MX-1, ID8, and L1210 cell lines by flow cytometry and confocal fluorescence microscopy (CFM). | S3          |
| Assessment of the time-dependent internalization of probe <b>2</b> in murine leukemia L1210FR (BR+) cell line by flow cytometry and CFM.                               | S3          |
| Assessment of the time-dependent internalization of probe <b>2</b> in human breast carcinoma MX-1 (BR+) cell line by flow cytometry and CFM.                           | S4          |
| <sup>1</sup> H, <sup>13</sup> C, and <sup>19</sup> F Spectra for <b>9</b>                                                                                              | S5-S7       |
| <sup>1</sup> H and <sup>13</sup> C Spectra for <b>1</b>                                                                                                                | S8-S9       |
| <sup>1</sup> H and <sup>13</sup> C Spectra for <b>11</b>                                                                                                               | S10-S11     |
| <sup>1</sup> H and <sup>13</sup> C Spectra for <b>2</b>                                                                                                                | S12-S13     |
| <sup>1</sup> H and <sup>13</sup> C Spectra for <b>13</b>                                                                                                               | S14-S15     |
| <sup>1</sup> H and <sup>13</sup> C Spectra for <b>14</b>                                                                                                               | S16-S17     |
| <sup>1</sup> H and <sup>13</sup> C Spectra for <b>15</b>                                                                                                               | S18-S19     |
| <sup>1</sup> H and <sup>13</sup> C Spectra for <b>6</b>                                                                                                                | S20-S21     |
| <sup>1</sup> H and <sup>13</sup> C Spectra for <b>4</b>                                                                                                                | S22-S23     |

**Figure S1.** Assessment of non-specific internalization in L1210FR, MX-1, ID8, and L1210 cell lines based on the extent of internalization of fluorescent taxoid probe **6** ( $5 \mu\text{M}$ ) by flow cytometry and confocal fluorescence microscopy (CFM) at 3 h,  $37^\circ\text{C}$ .

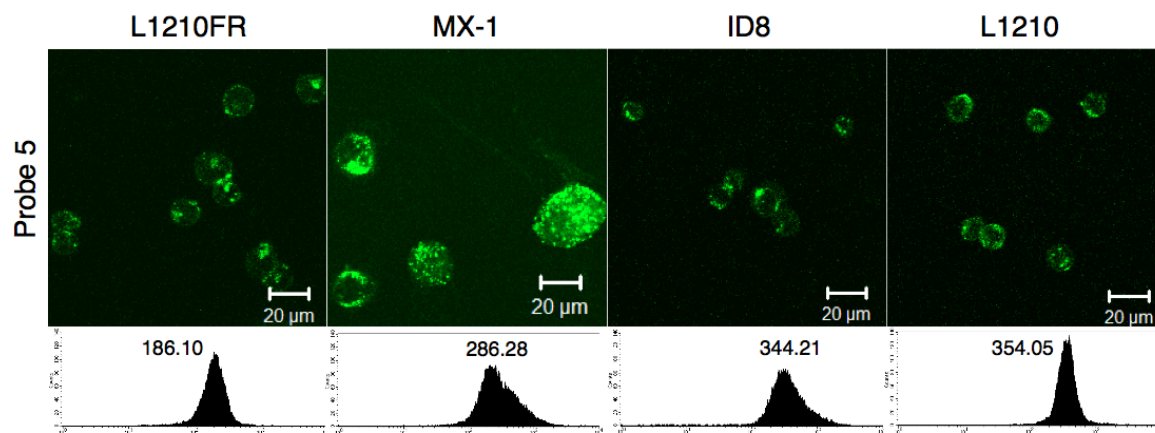

**Figure S2.** Assessment of the time-dependent internalization of theranostic conjugate **2** ( $5 \mu\text{M}$ ) by RME in murine leukemia L1210FR (BR+) cell line based on the flow cytometry and confocal fluorescence microscopy analysis in the time period from 15 min to 24 h at  $37^\circ\text{C}$ .

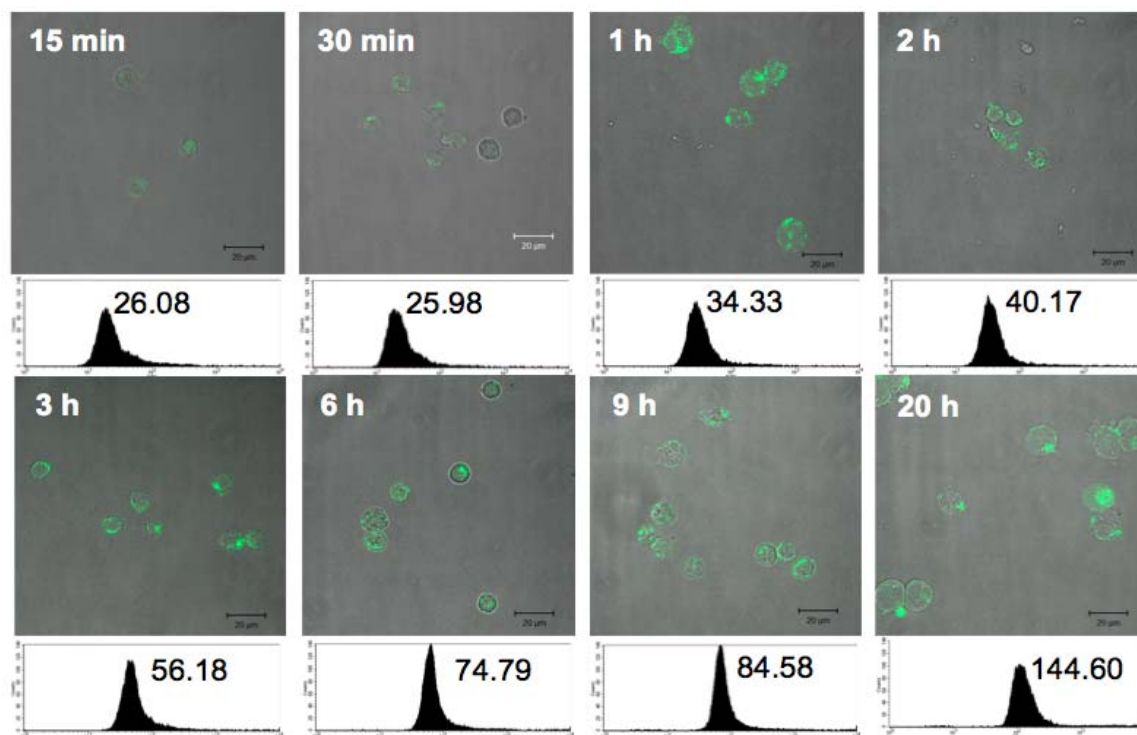

**Figure S3.** Assessment of the time-dependent internalization of 5  $\mu\text{M}$  theranostic conjugate **2** by RME in human breast carcinoma MX-1 (BR+) cell line based on the flow cytometry and confocal fluorescence microscopy analysis in the time period from 30 min to 24 h at 37  $^{\circ}\text{C}$ .

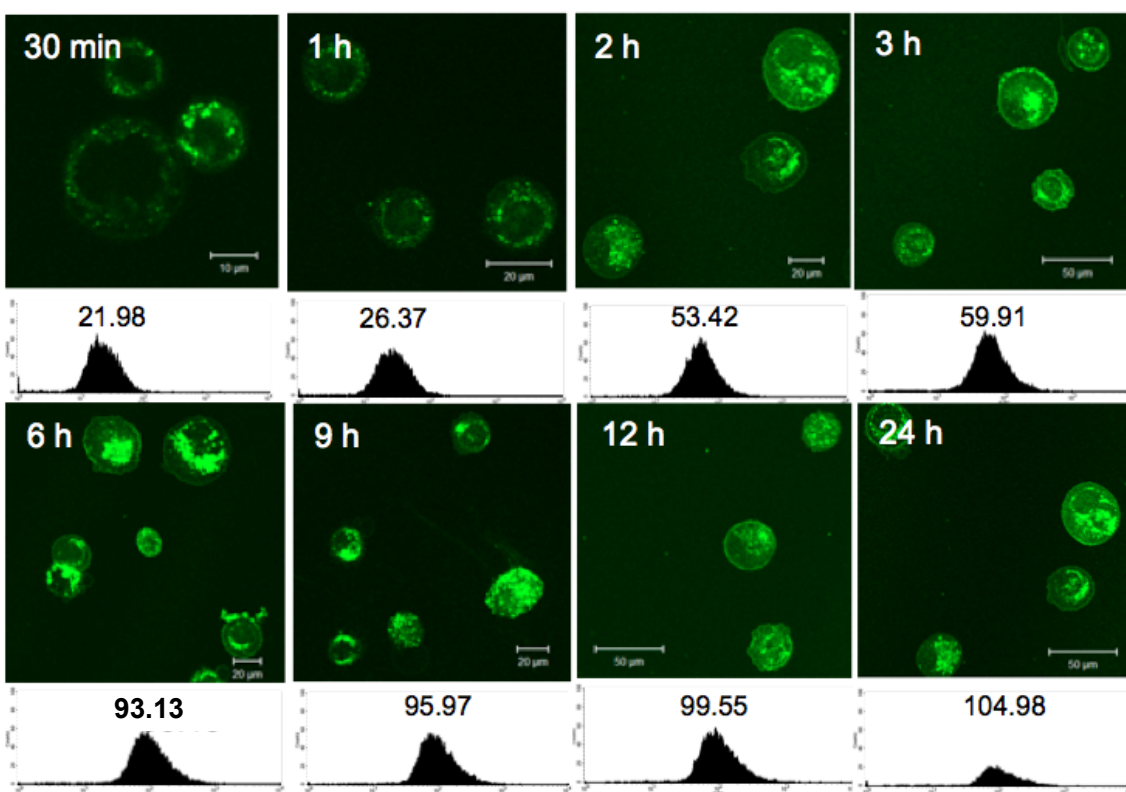

Compound Name: JGV-03-016  
Processed by: Jacob Vineberg  
Pulse Sequence: s2pul  
Spectrometer Freq.: 300.07 MHz  
Solvent: CDCl<sub>3</sub>  
Temperature: 298.15 K  
Spectral Width: 15.00 ppm  
Number of Scans: 48  
Relaxation Delay: 1.000 s

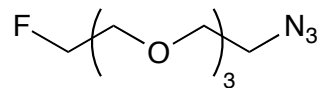

*Compound 9*

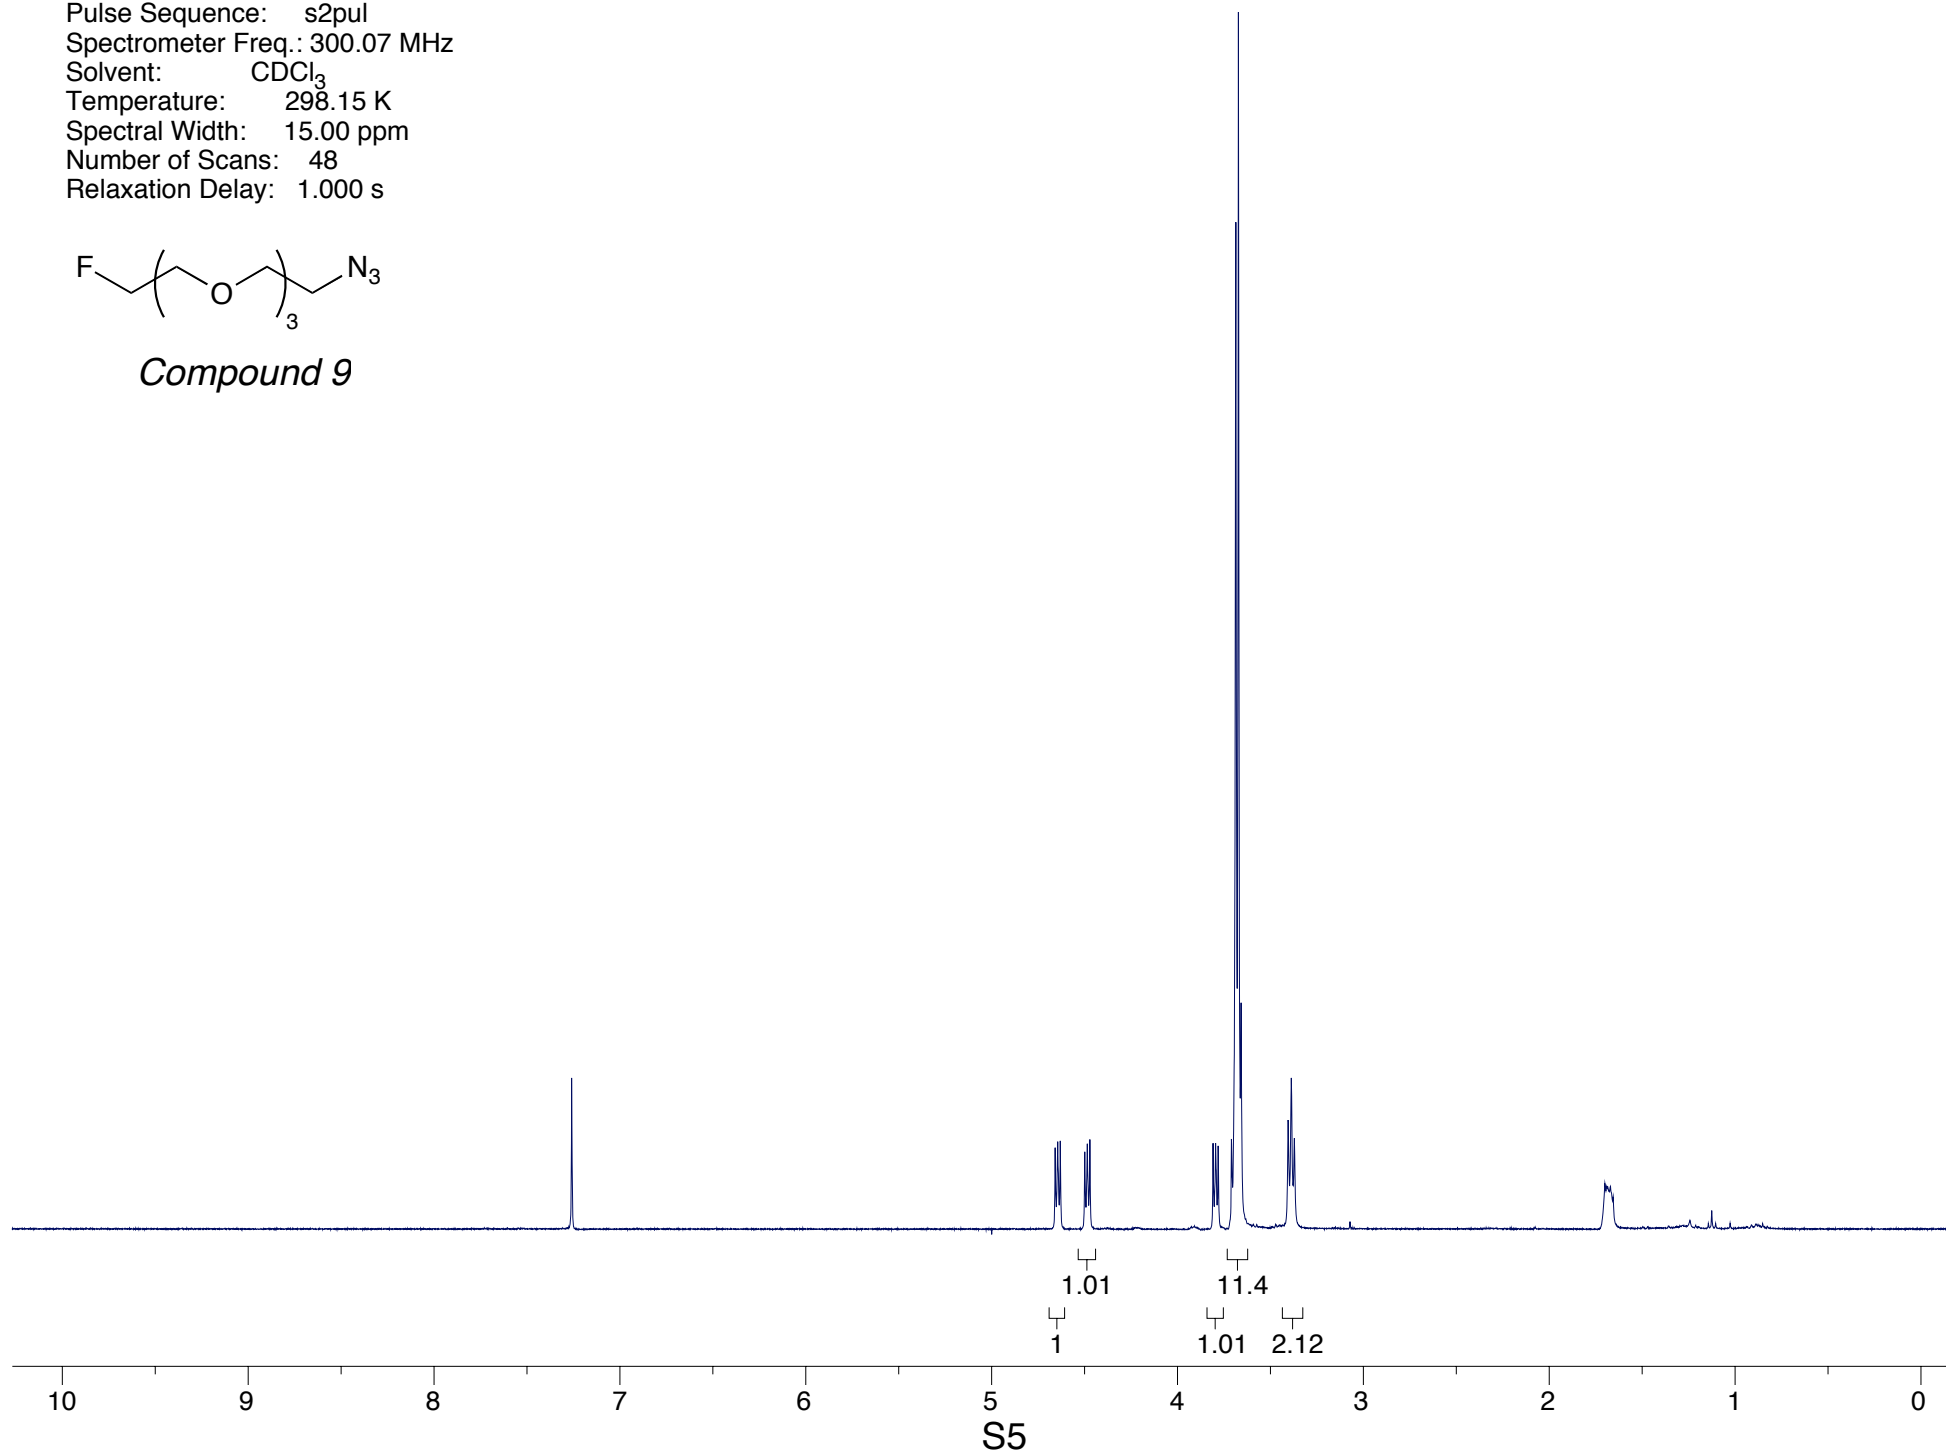

Compound Name: JGV-03-016-<sup>13</sup>C  
Processed by: Jacob Vineberg  
Pulse Sequence: zgpg30  
Spectrometer Freq.: 125.71 MHz  
Solvent: CDCl<sub>3</sub>  
Temperature: 298.15 K  
Spectral Width: 236.75 ppm  
Number of Scans: 242  
Relaxation Delay: 2.000 s

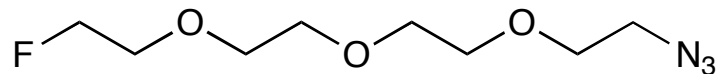

*Compound 9*

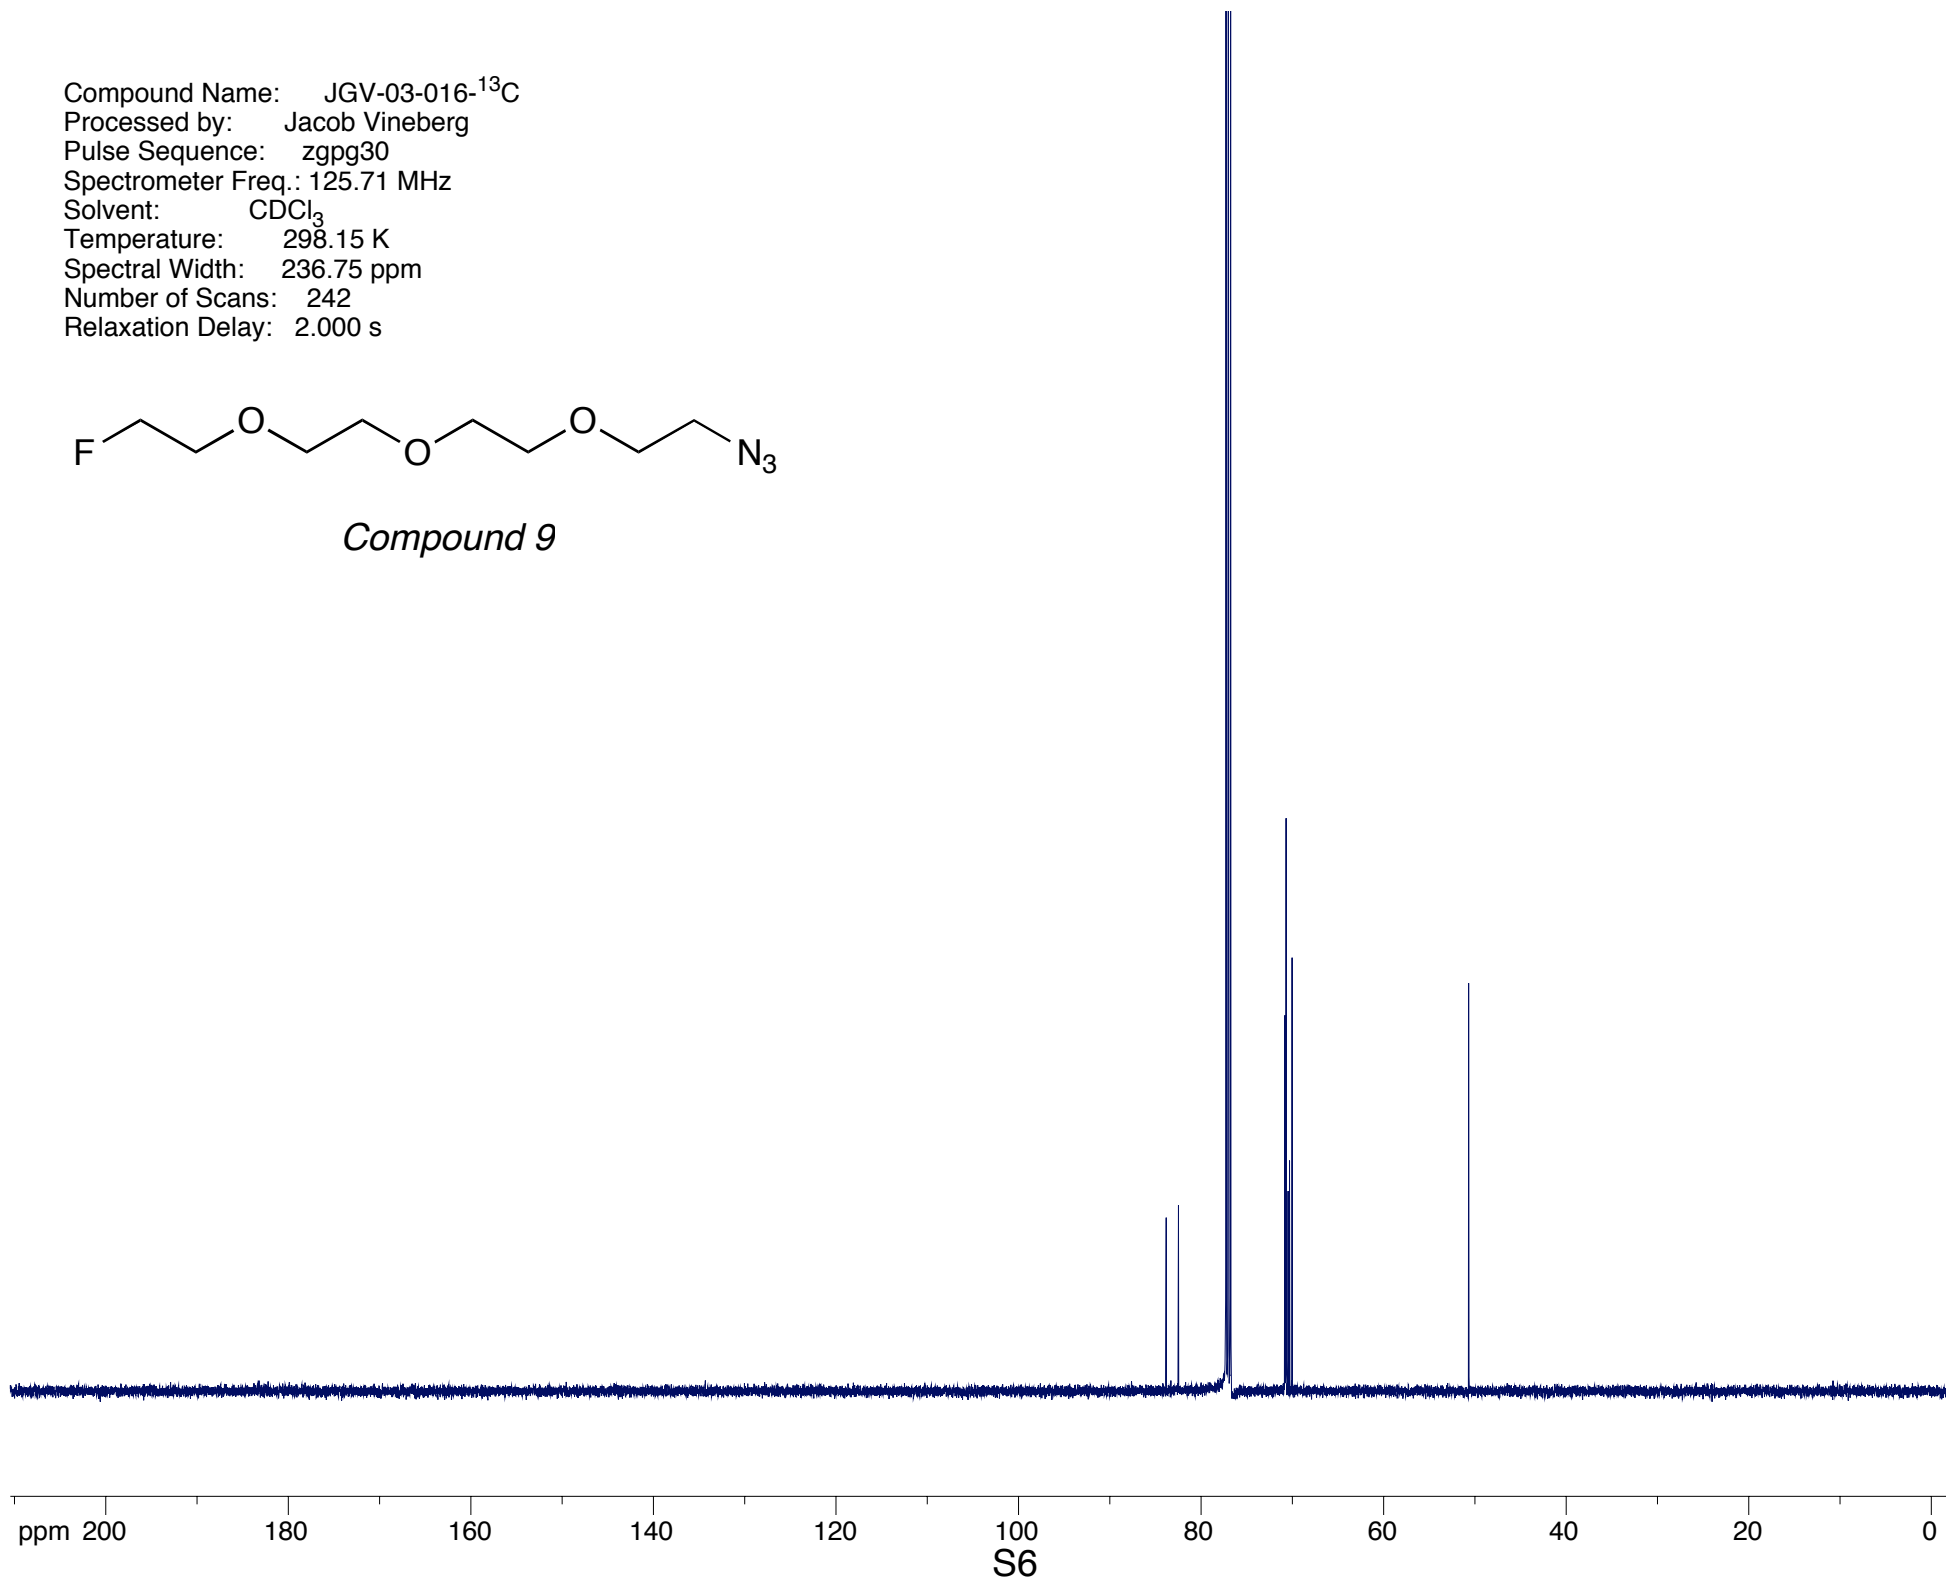

Compound Name: JGV-03-016-<sup>19</sup>F  
Processed by: Jacob Vineberg  
Pulse Sequence: s2pul  
Spectrometer Freq.: 282.32 MHz  
Solvent: CDCl<sub>3</sub>  
Temperature: 298.15 K  
Spectral Width: 177.10 ppm  
Number of Scans: 200  
Relaxation Delay: 4.000 s

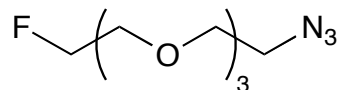

*Compound 9*

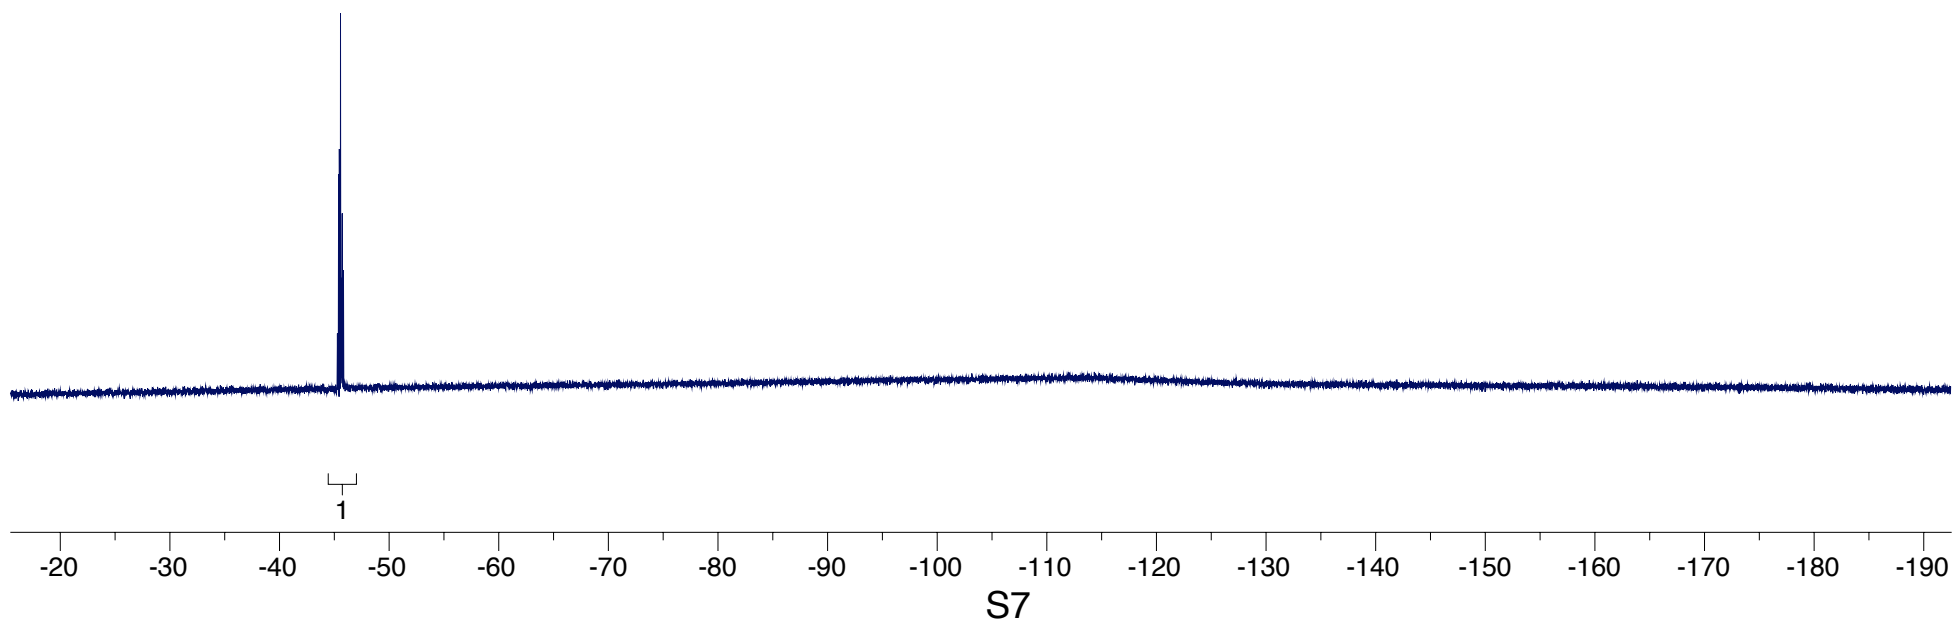

Compound Name: JGV-03-018  
Processed by: Jacob Vineberg  
Pulse Sequence: zg30  
Spectrometer Freq.: 499.89 MHz  
Solvent: MeOD  
Temperature: 298.15 K  
Spectral Width: 20.00 ppm  
Number of Scans: 47  
Relaxation Delay: 1.000 s

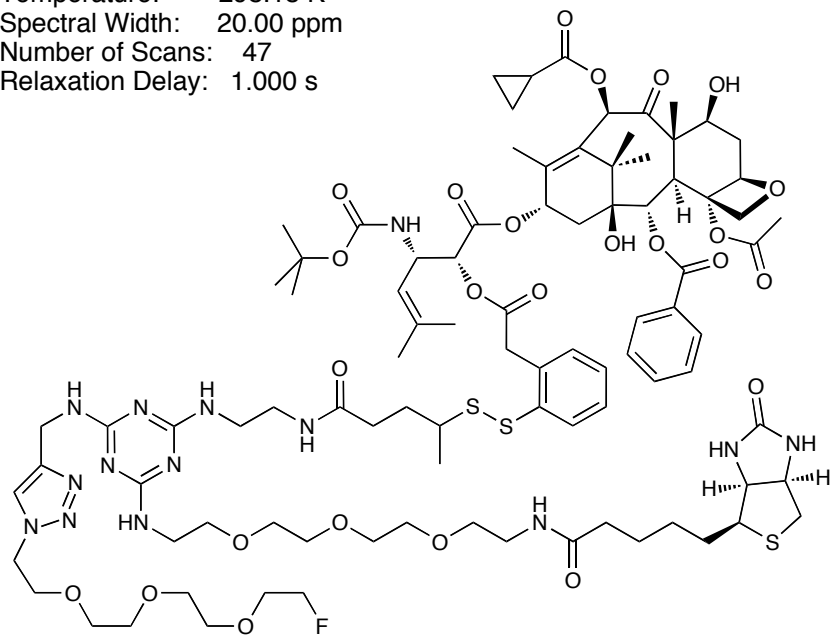

*Conjugate 1*

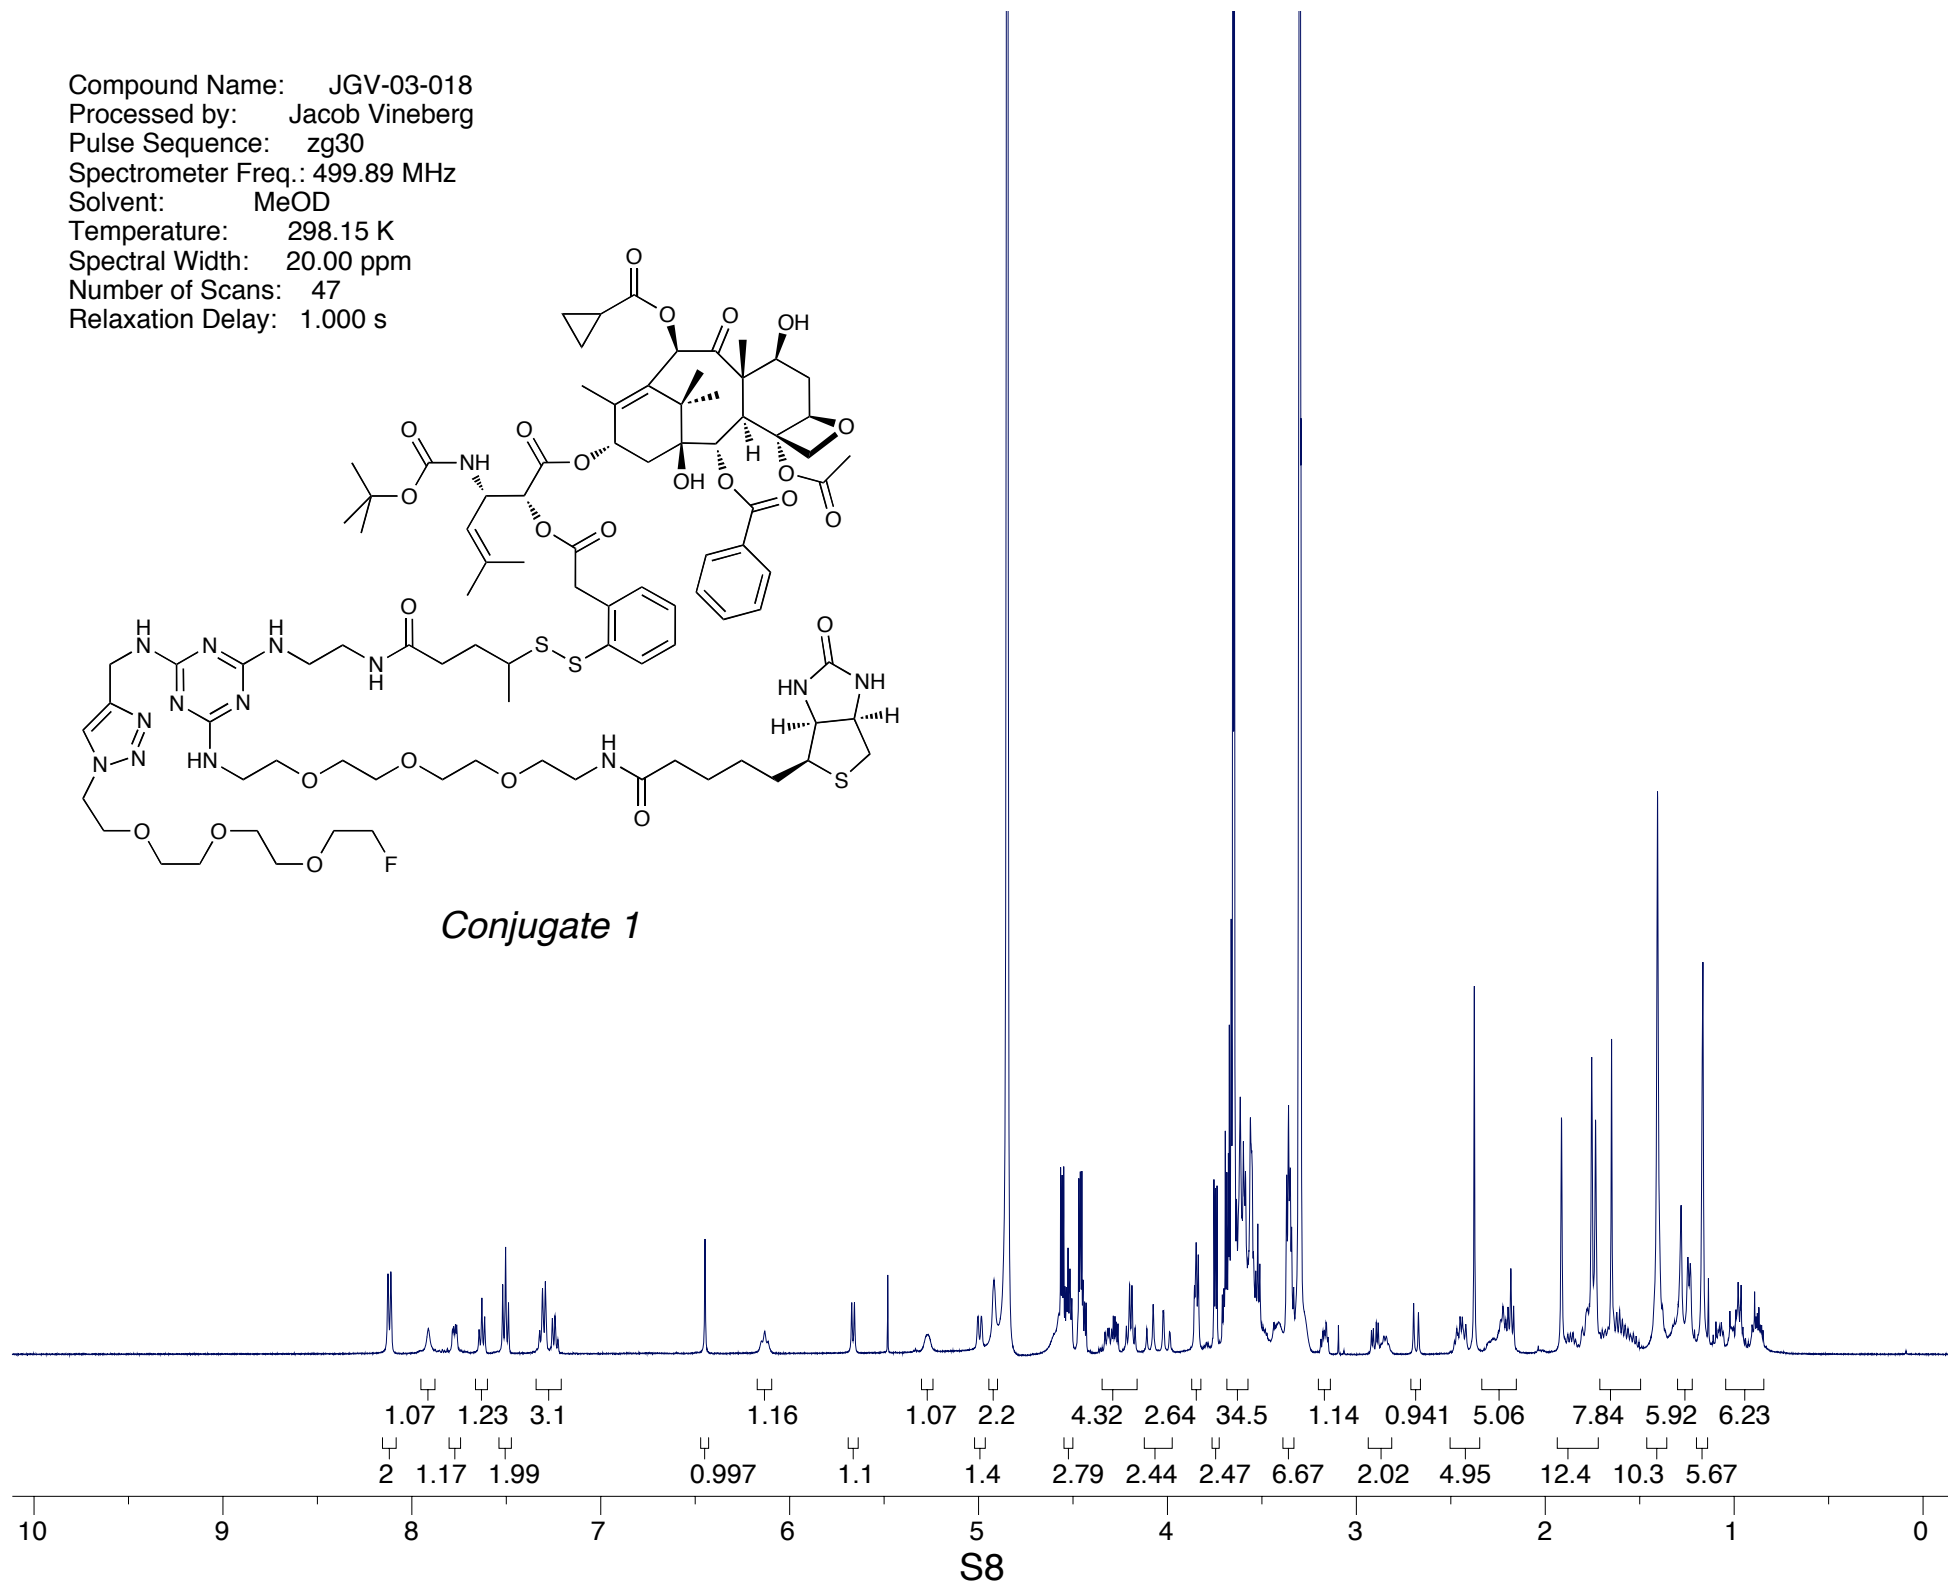



Compound Name: JGV-03-018-<sup>13</sup>C  
Processed by: Jacob Vineberg  
Pulse Sequence: zgpg30  
Spectrometer Freq.: 125.71 MHz  
Solvent: MeOD  
Temperature: 298.15 K  
Spectral Width: 236.75 ppm  
Number of Scans: 20216  
Relaxation Delay: 2.000 s

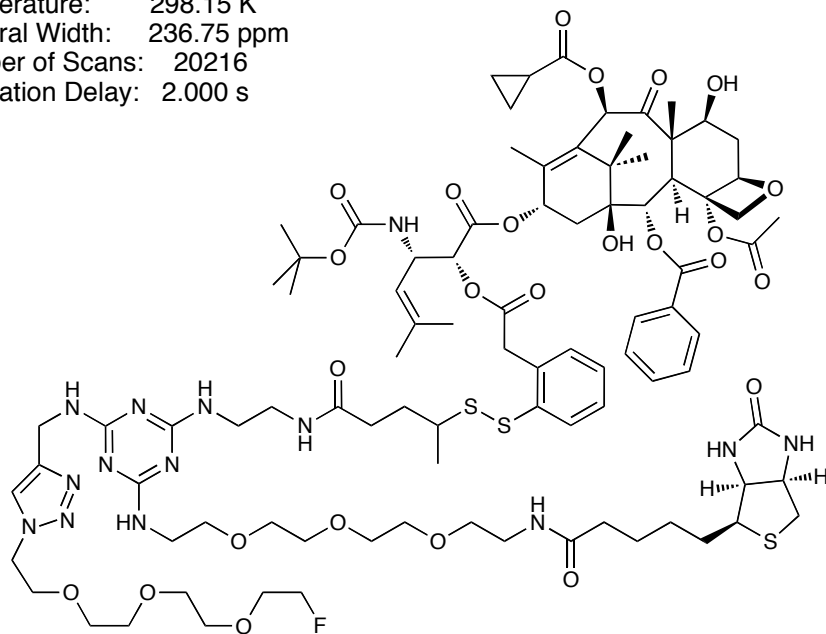

*Conjugate 1*

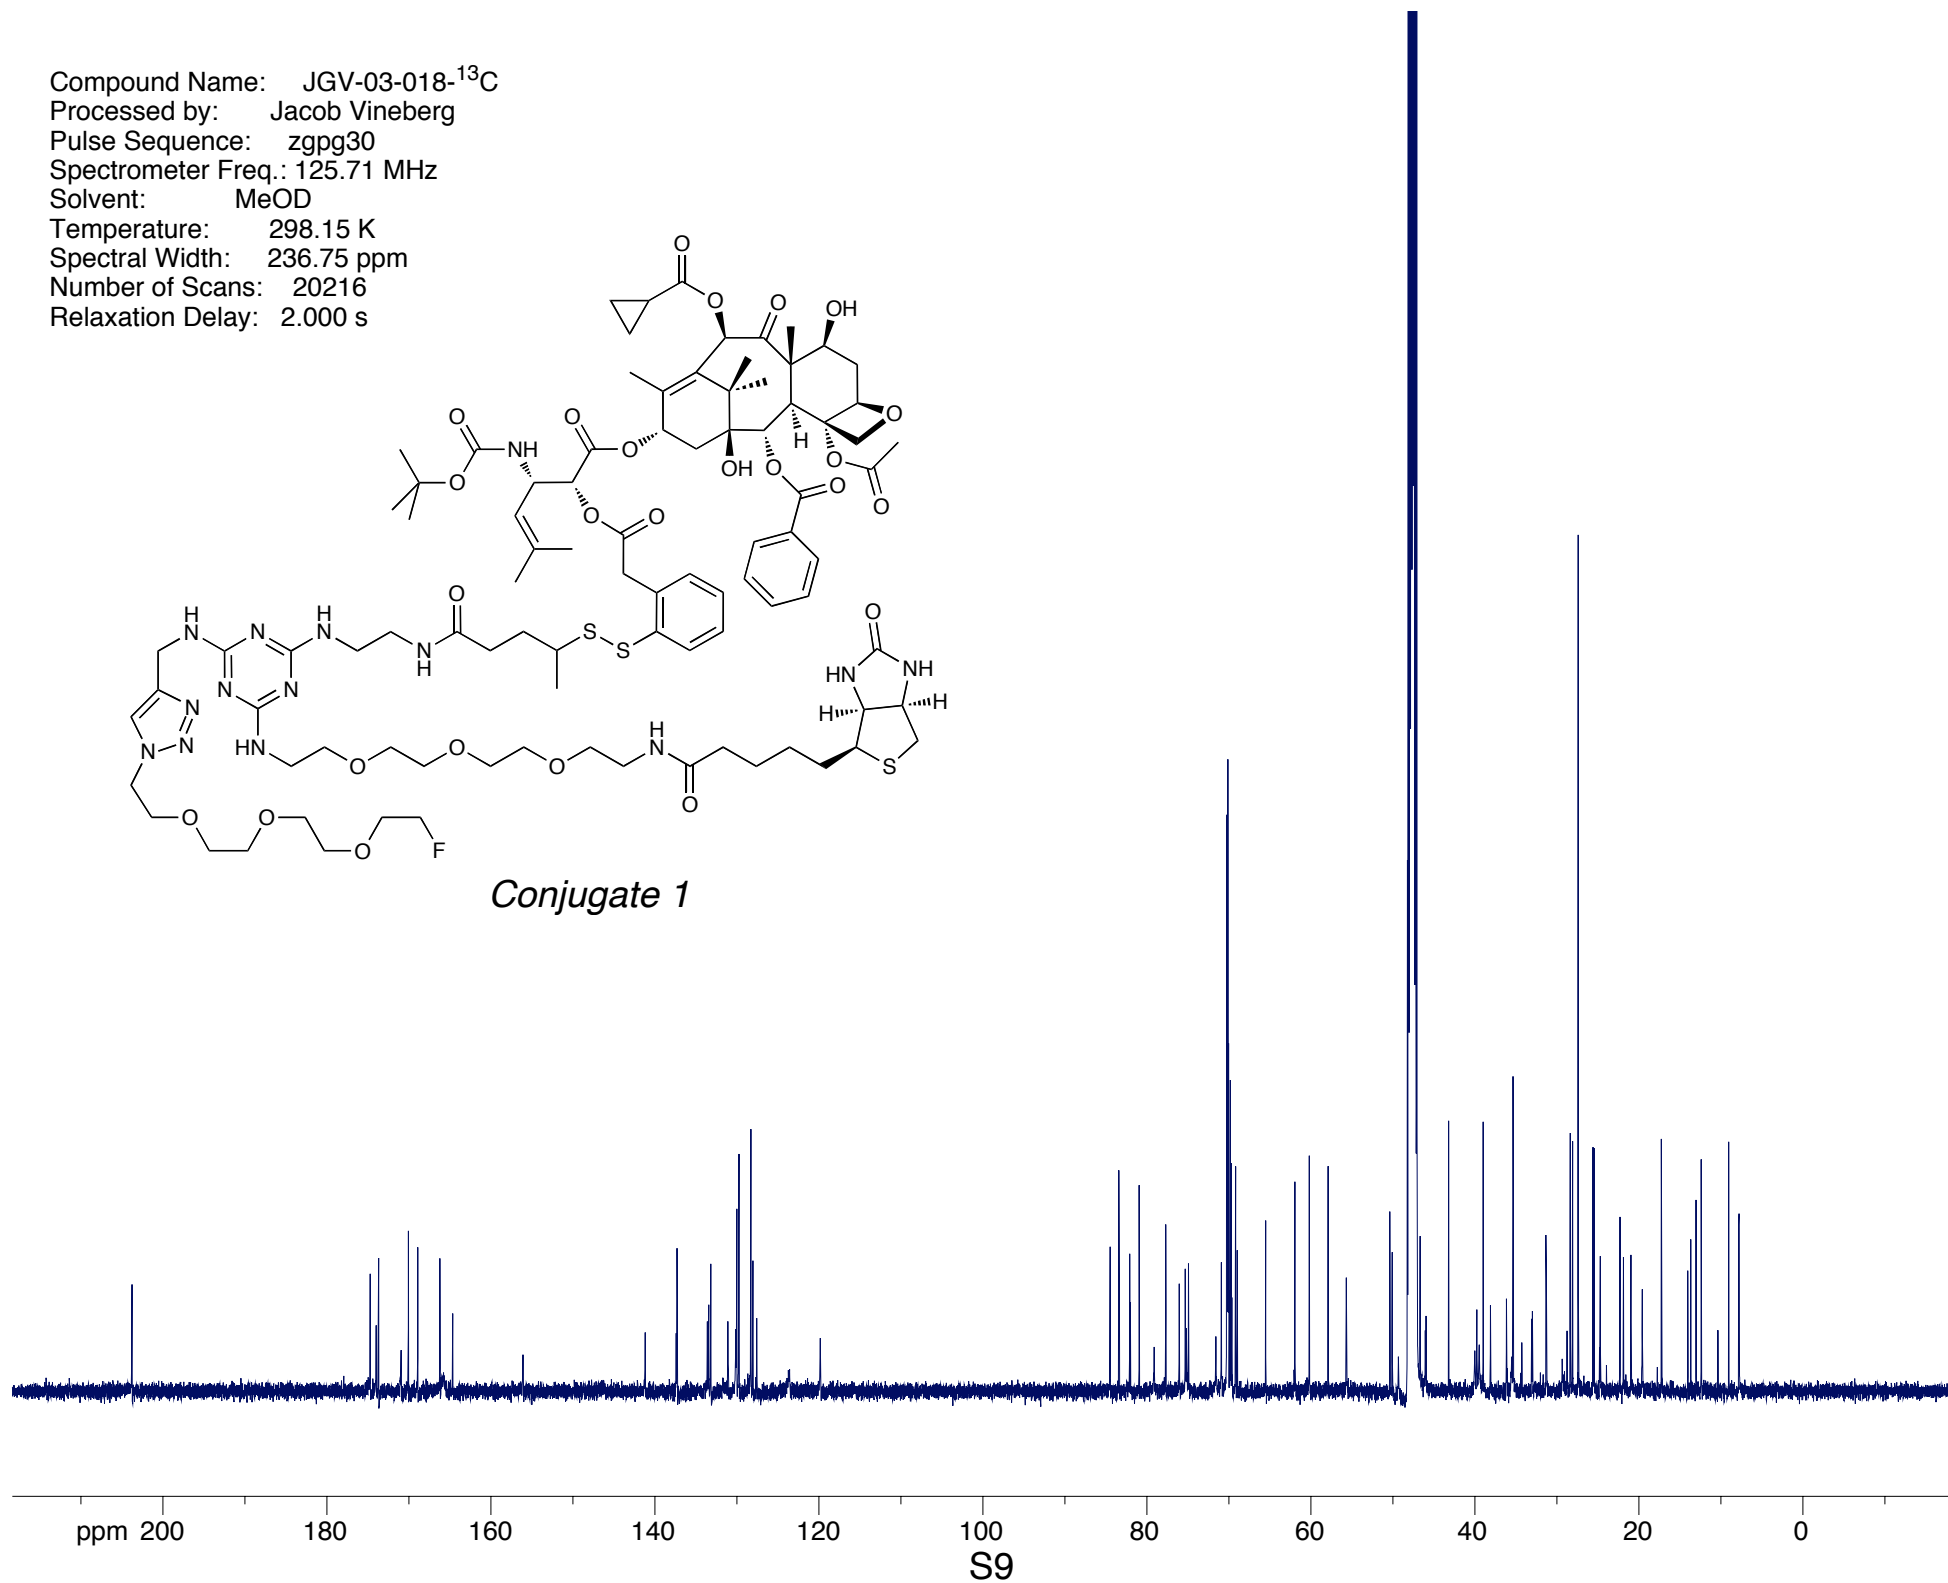

Acquisition Date: JGV-03-026  
Processed by: Jacob Vineberg  
Pulse Sequence: zg30  
Spectrometer Freq.: 499.89 MHz  
Solvent: DMSO  
Temperature: 298.15 K  
Spectral Width: 20.00 ppm  
Number of Scans: 43  
Relaxation Delay: 1.000 s

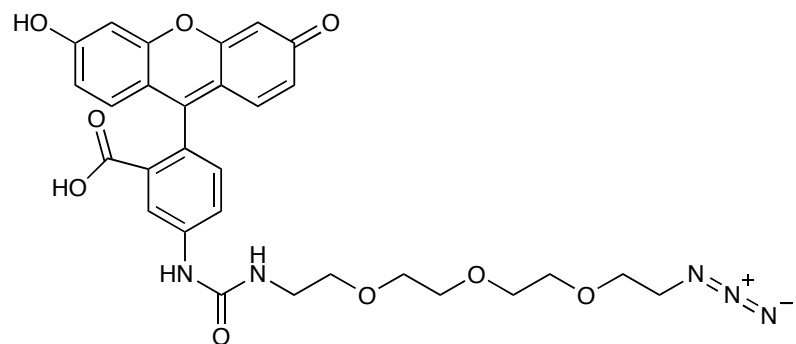

*Compound 11*

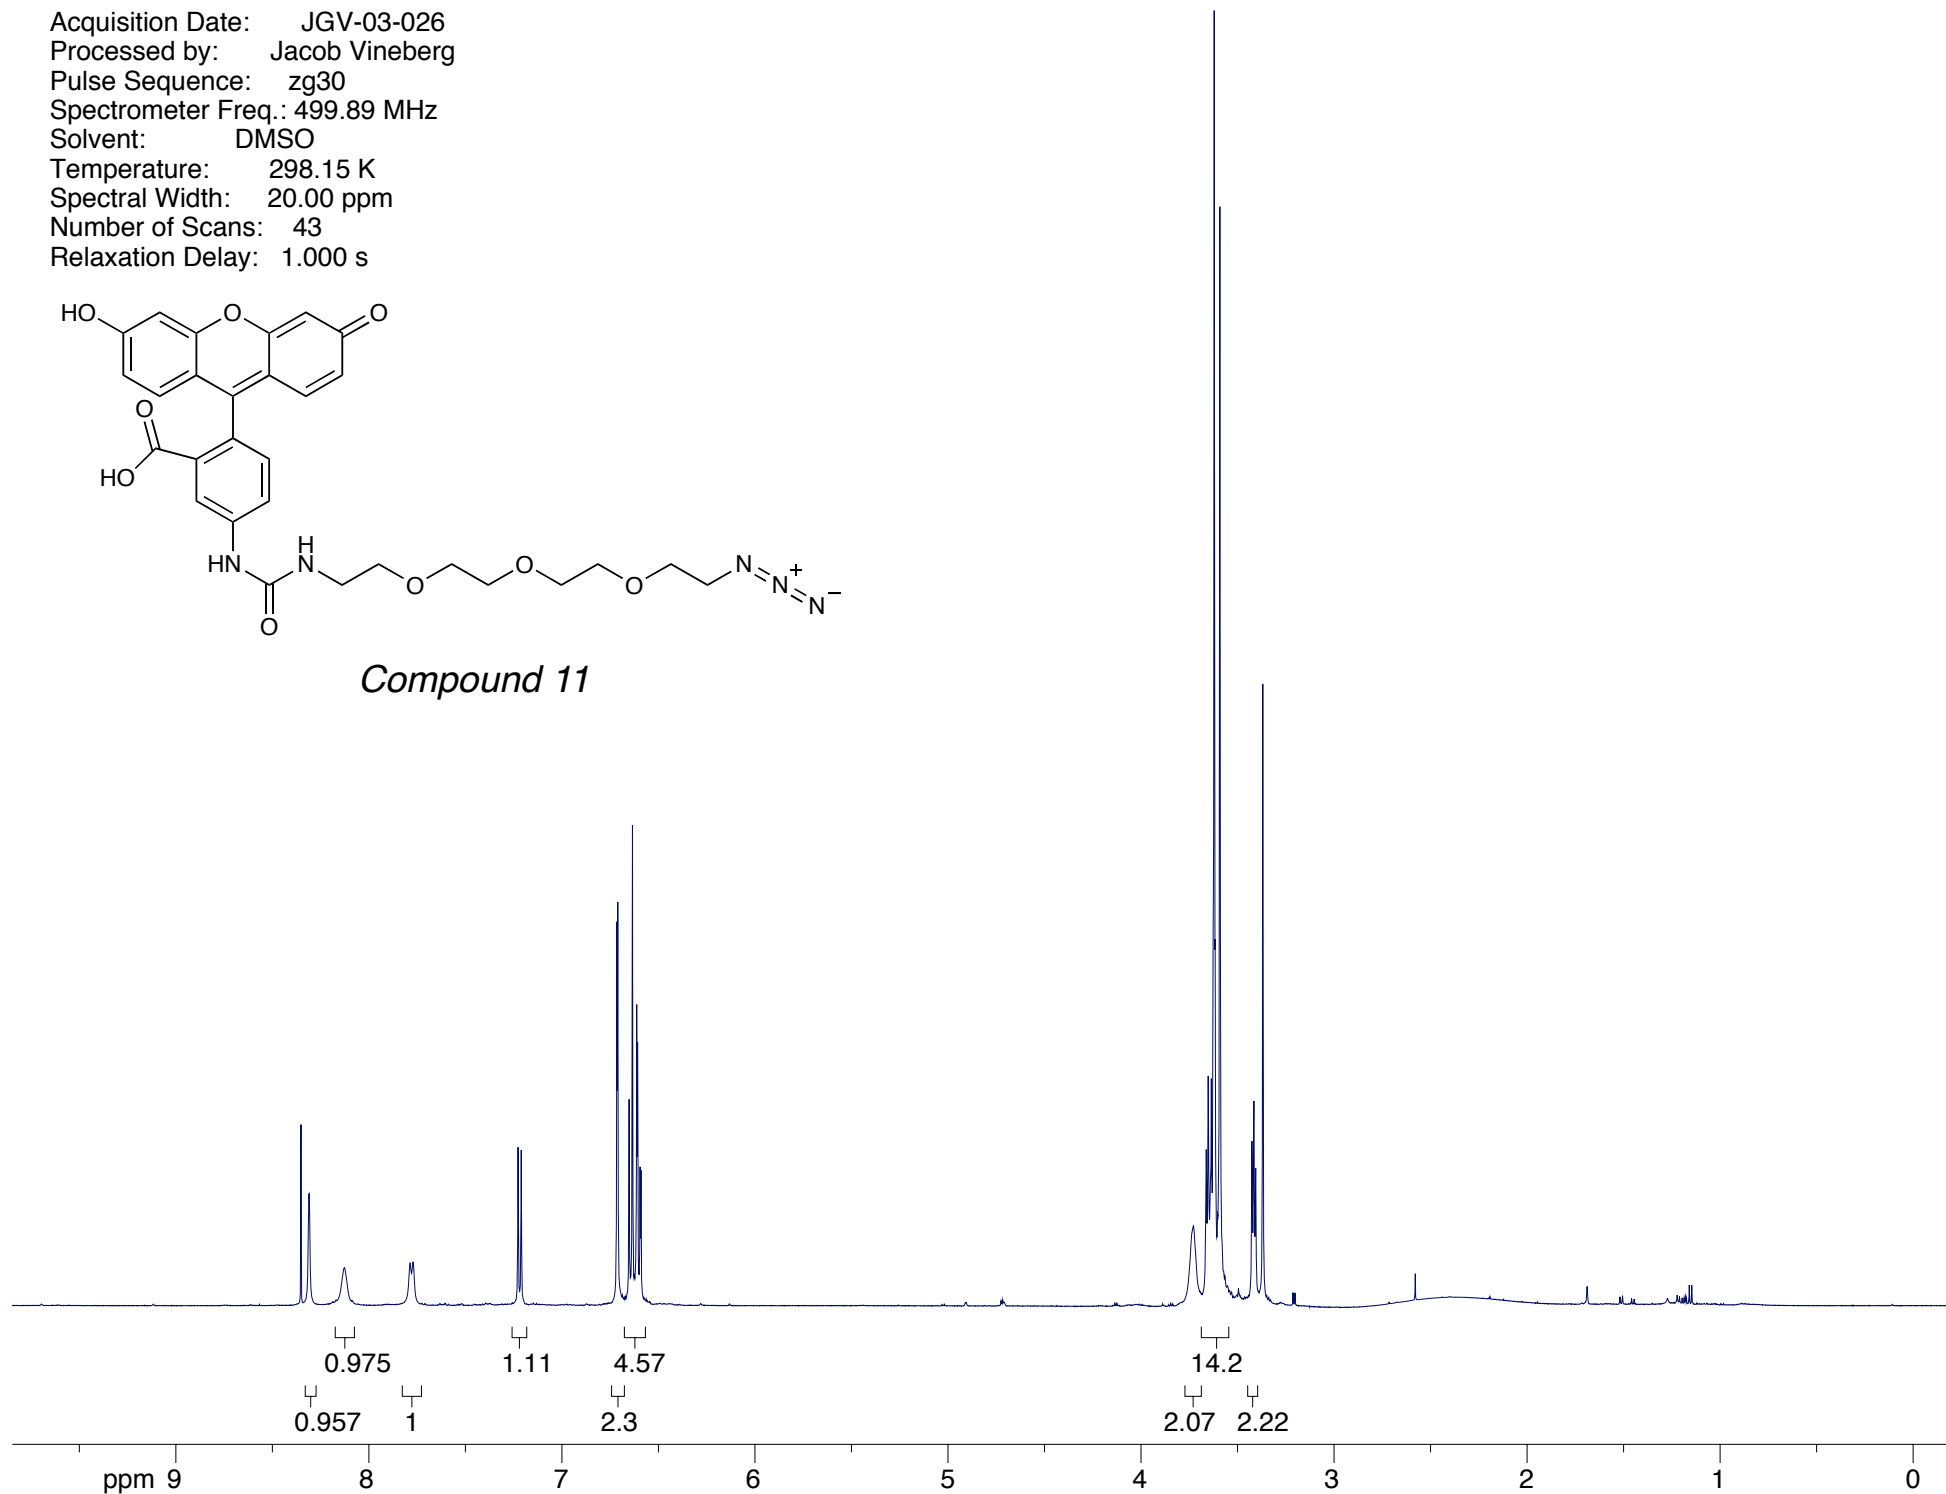

Compound Name: JGV-03-026-<sup>13</sup>C  
Processed by: Jacob Vineberg  
Pulse Sequence: zgpg30  
Spectrometer Freq.: 125.71 MHz  
Solvent: DMSO  
Temperature: 298.15 K  
Spectral Width: 236.75 ppm  
Number of Scans: 2835  
Relaxation Delay: 2.000 s

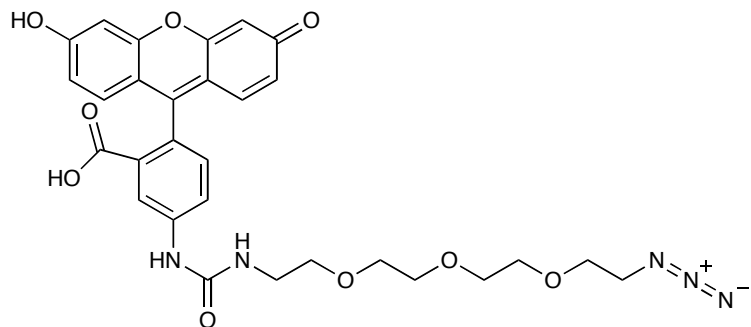

*Compound 11*

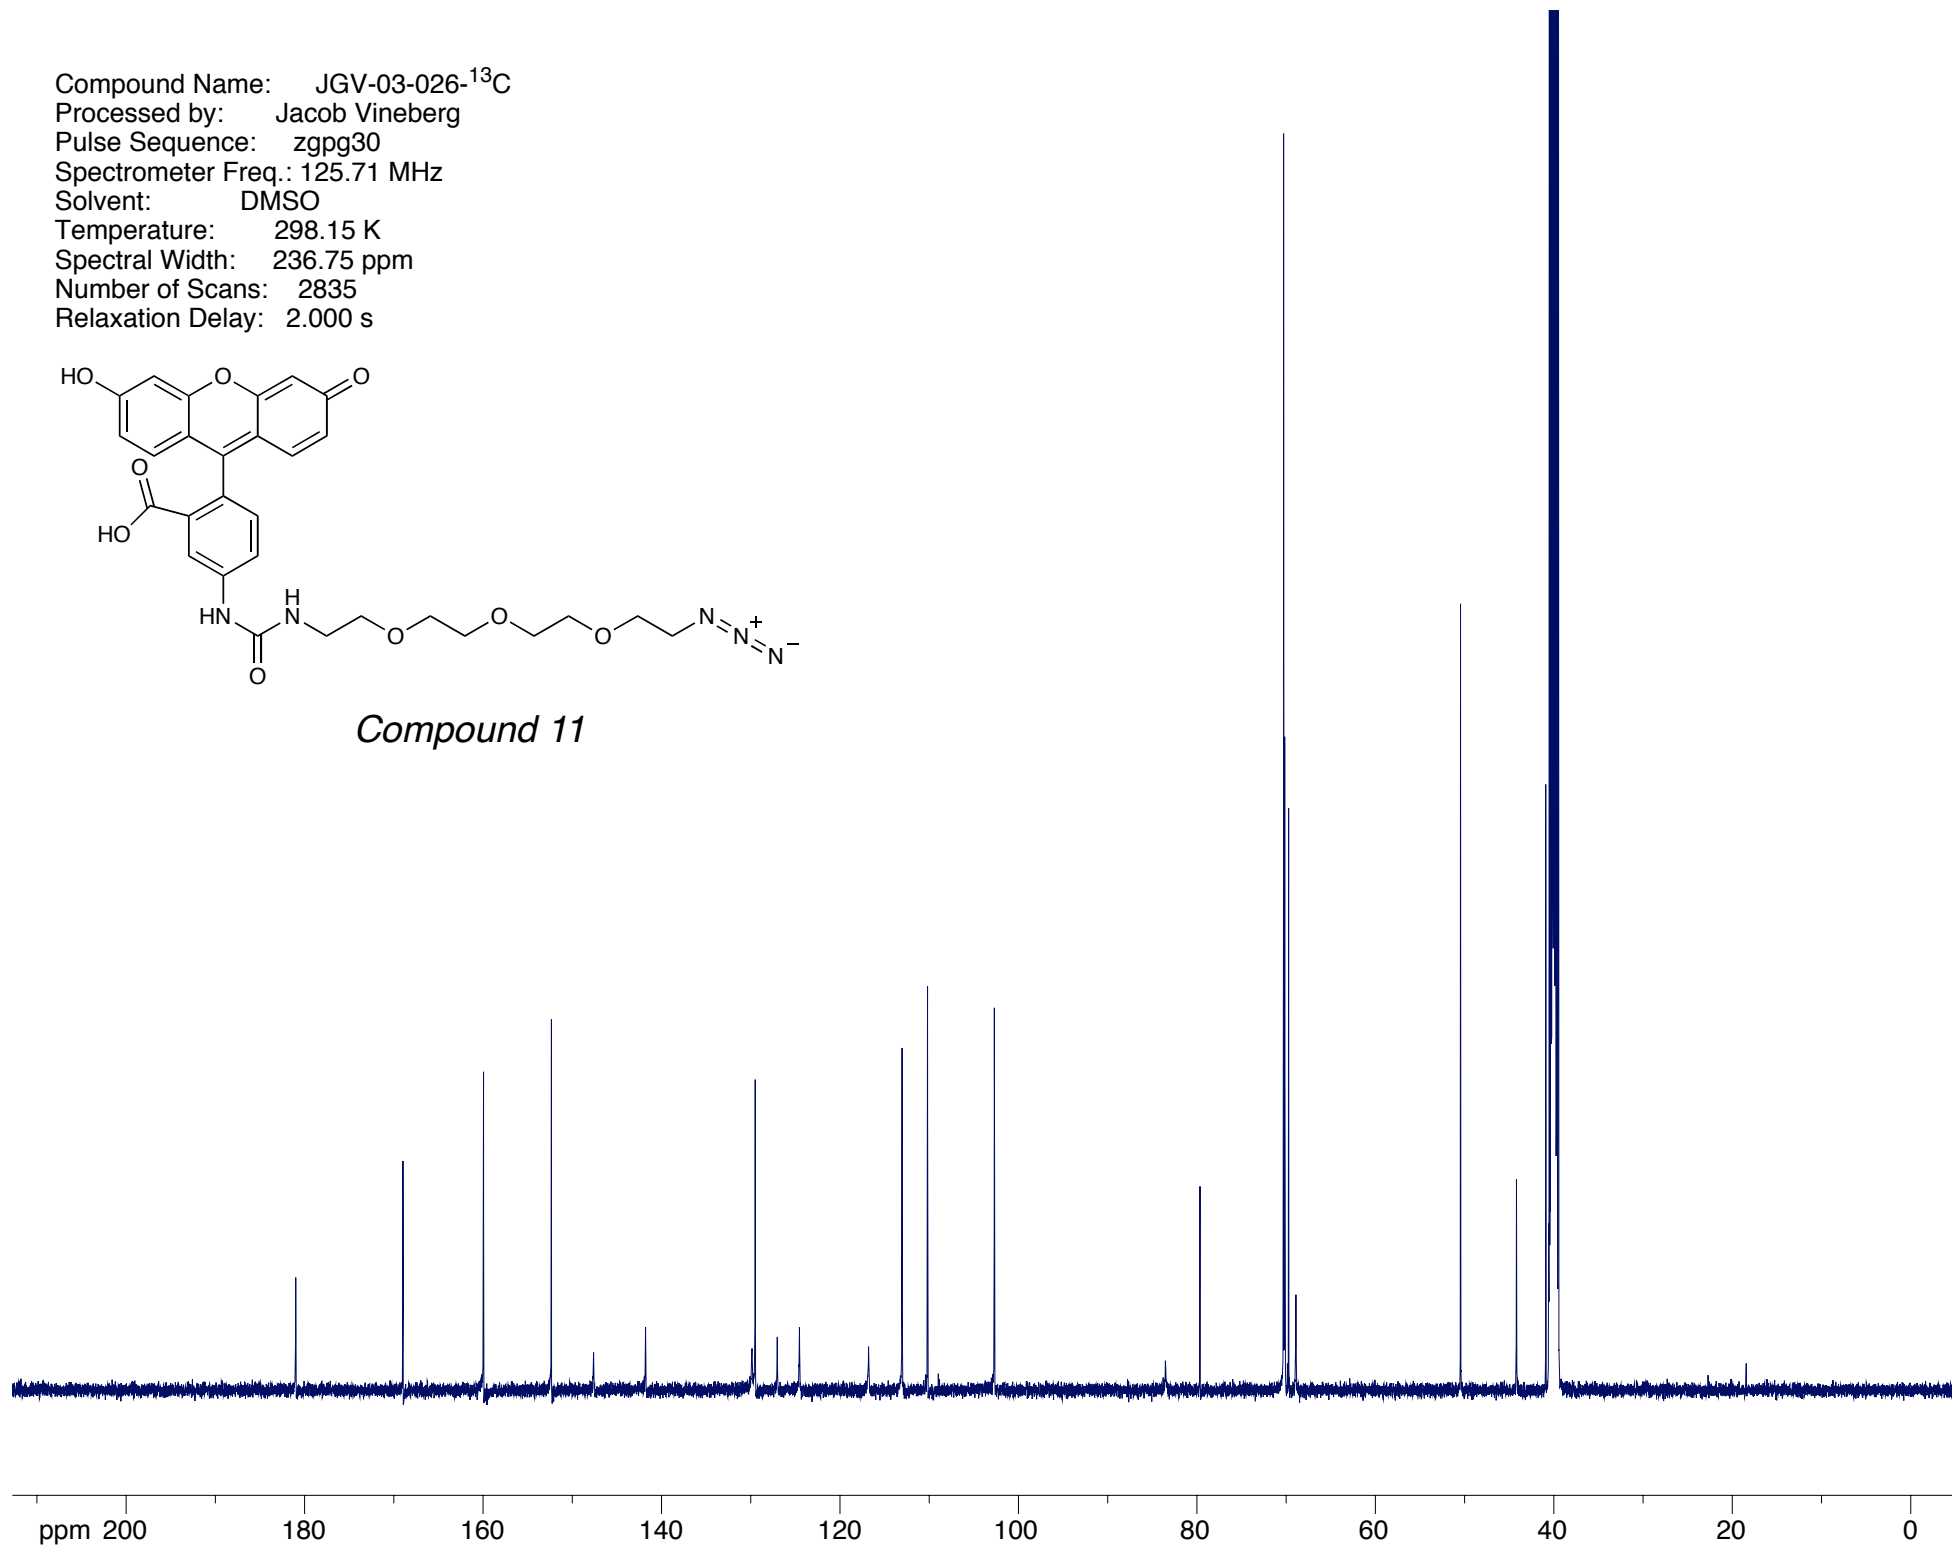

Compound Name: JGV-03-029  
Processed by: Jacob Vineberg  
Pulse Sequence: zg30  
Spectrometer Freq.: 499.89 MHz  
Solvent: DMSO  
Temperature: 298.15 K  
Spectral Width: 20.00 ppm  
Number of Scans: 139  
Relaxation Delay: 1.000 s

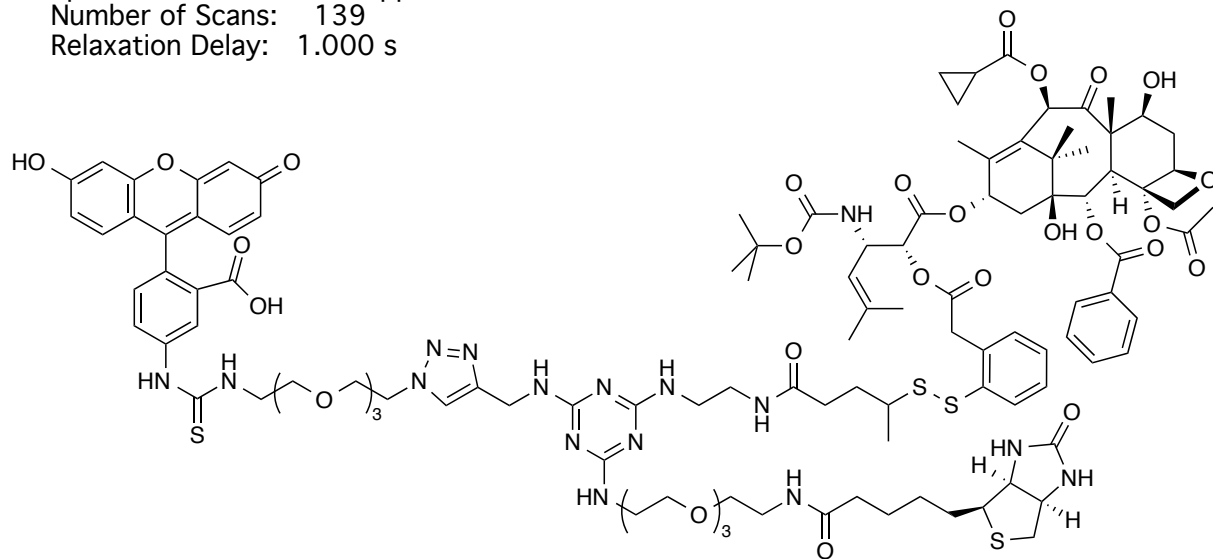

*Conjugate 2*

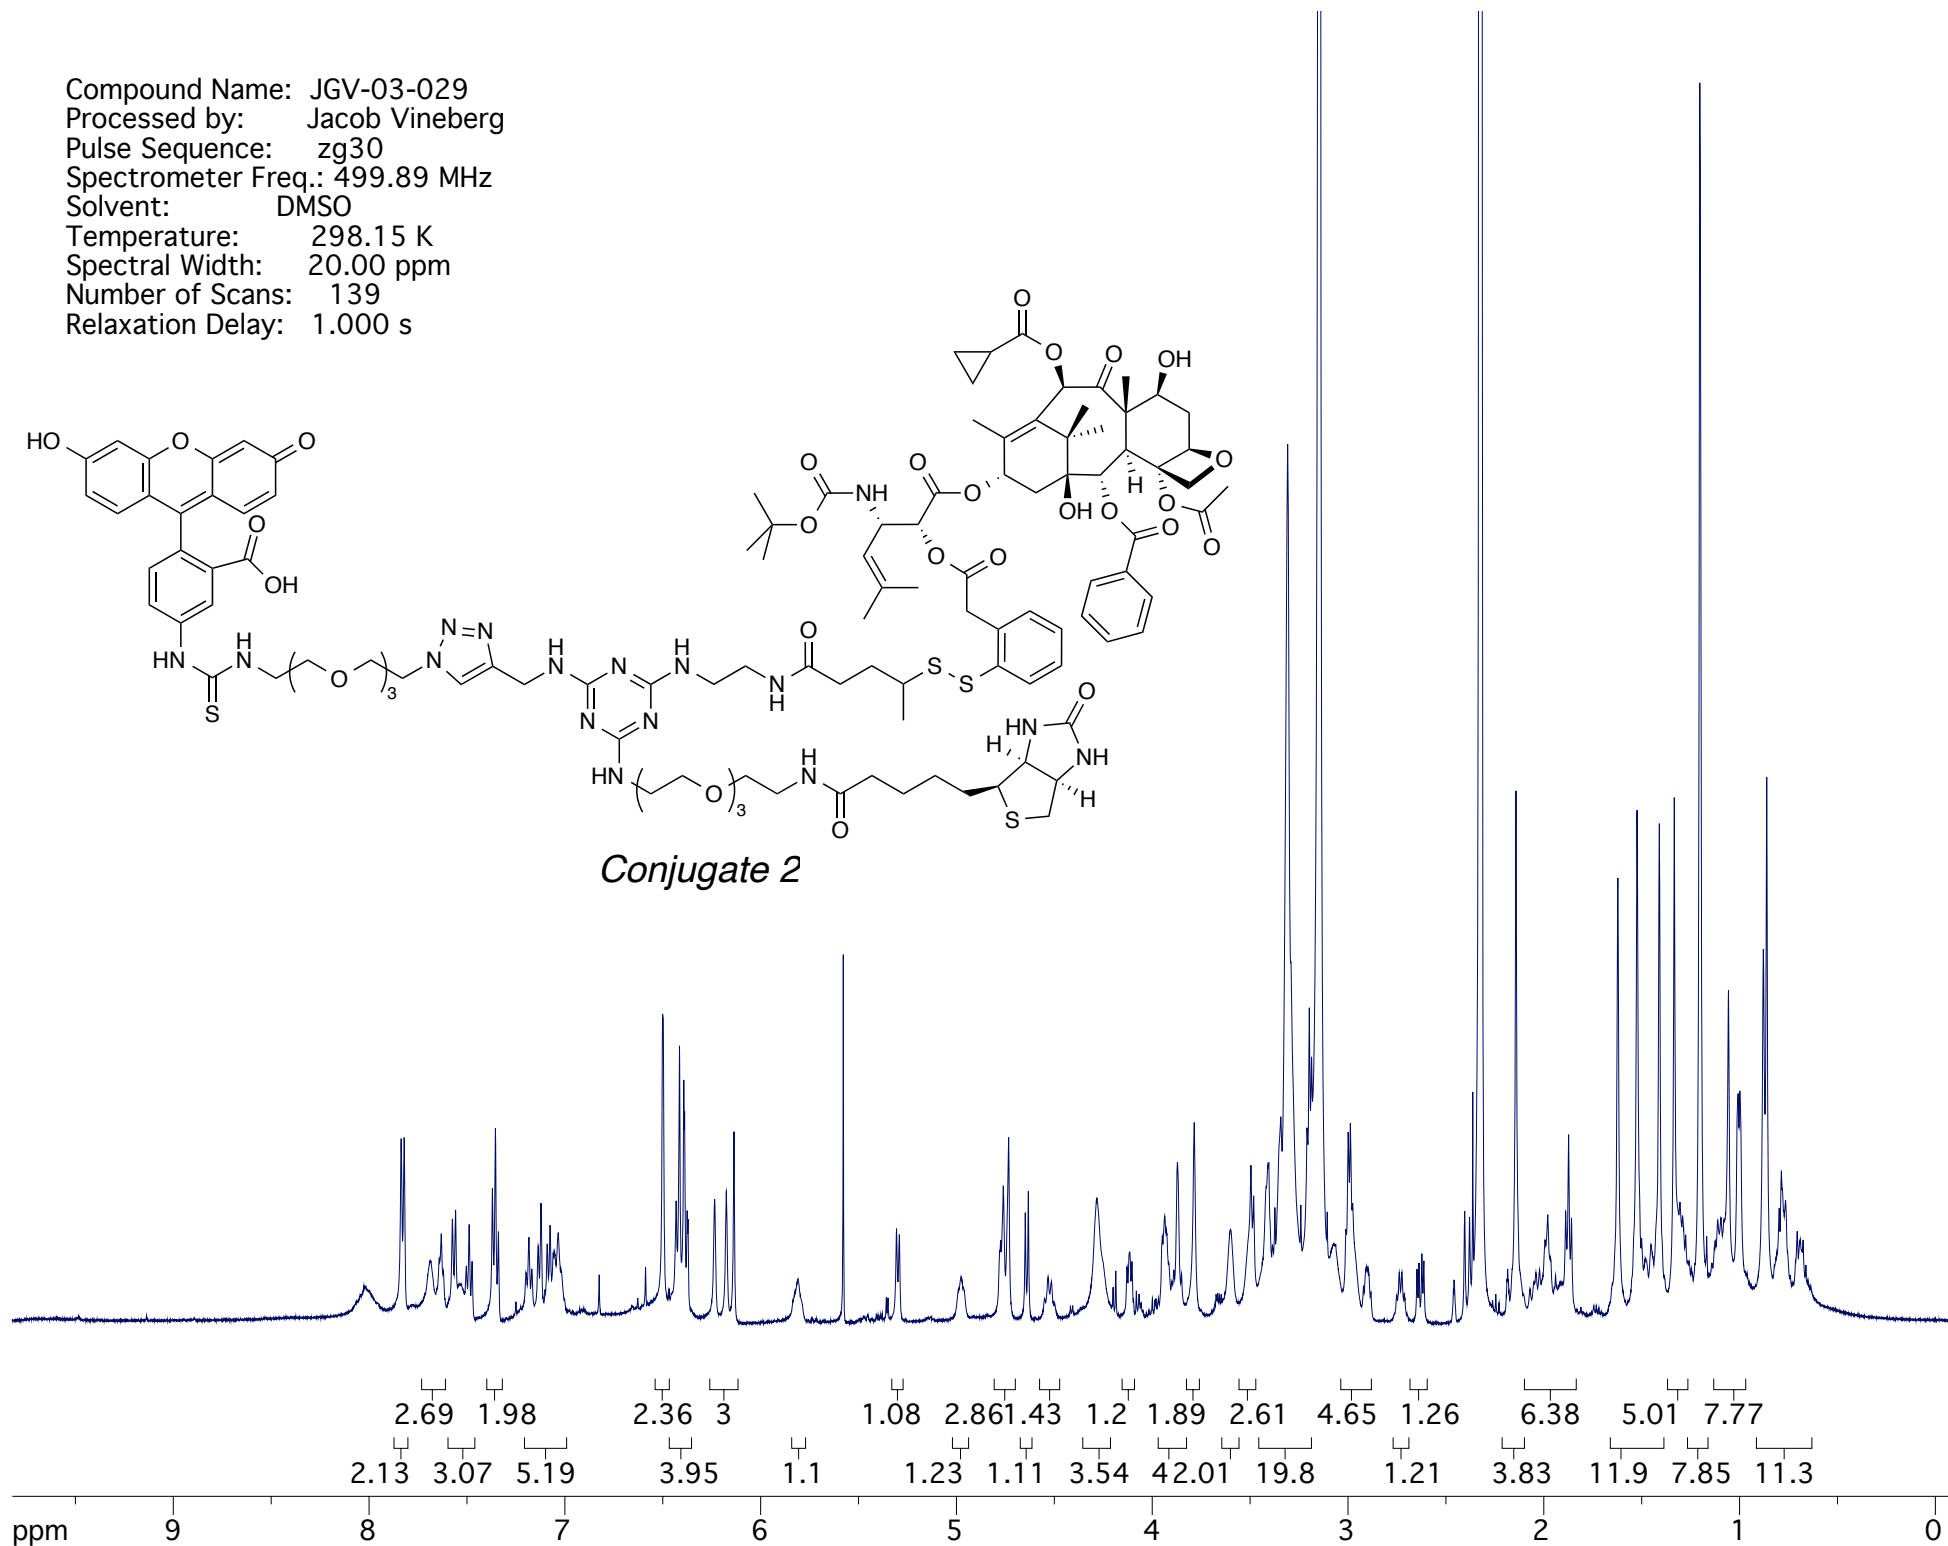

Compound Name: JGV-03-029  
Processed by: Jacob Vineberg  
Pulse Sequence: zgpg30  
Spectrometer Freq.: 125.71 MHz  
Solvent: DMSO  
Temperature: 298.15 K  
Spectral Width: 236.75 ppm  
Number of Scans: 15586  
Relaxation Delay: 2.000 s

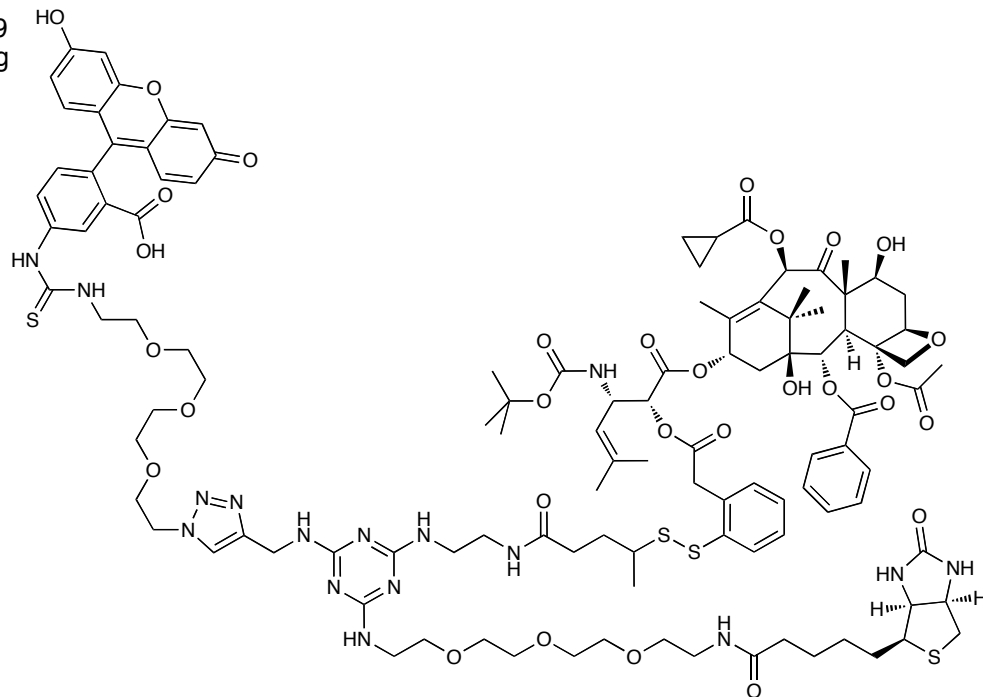

*Conjugate 2*

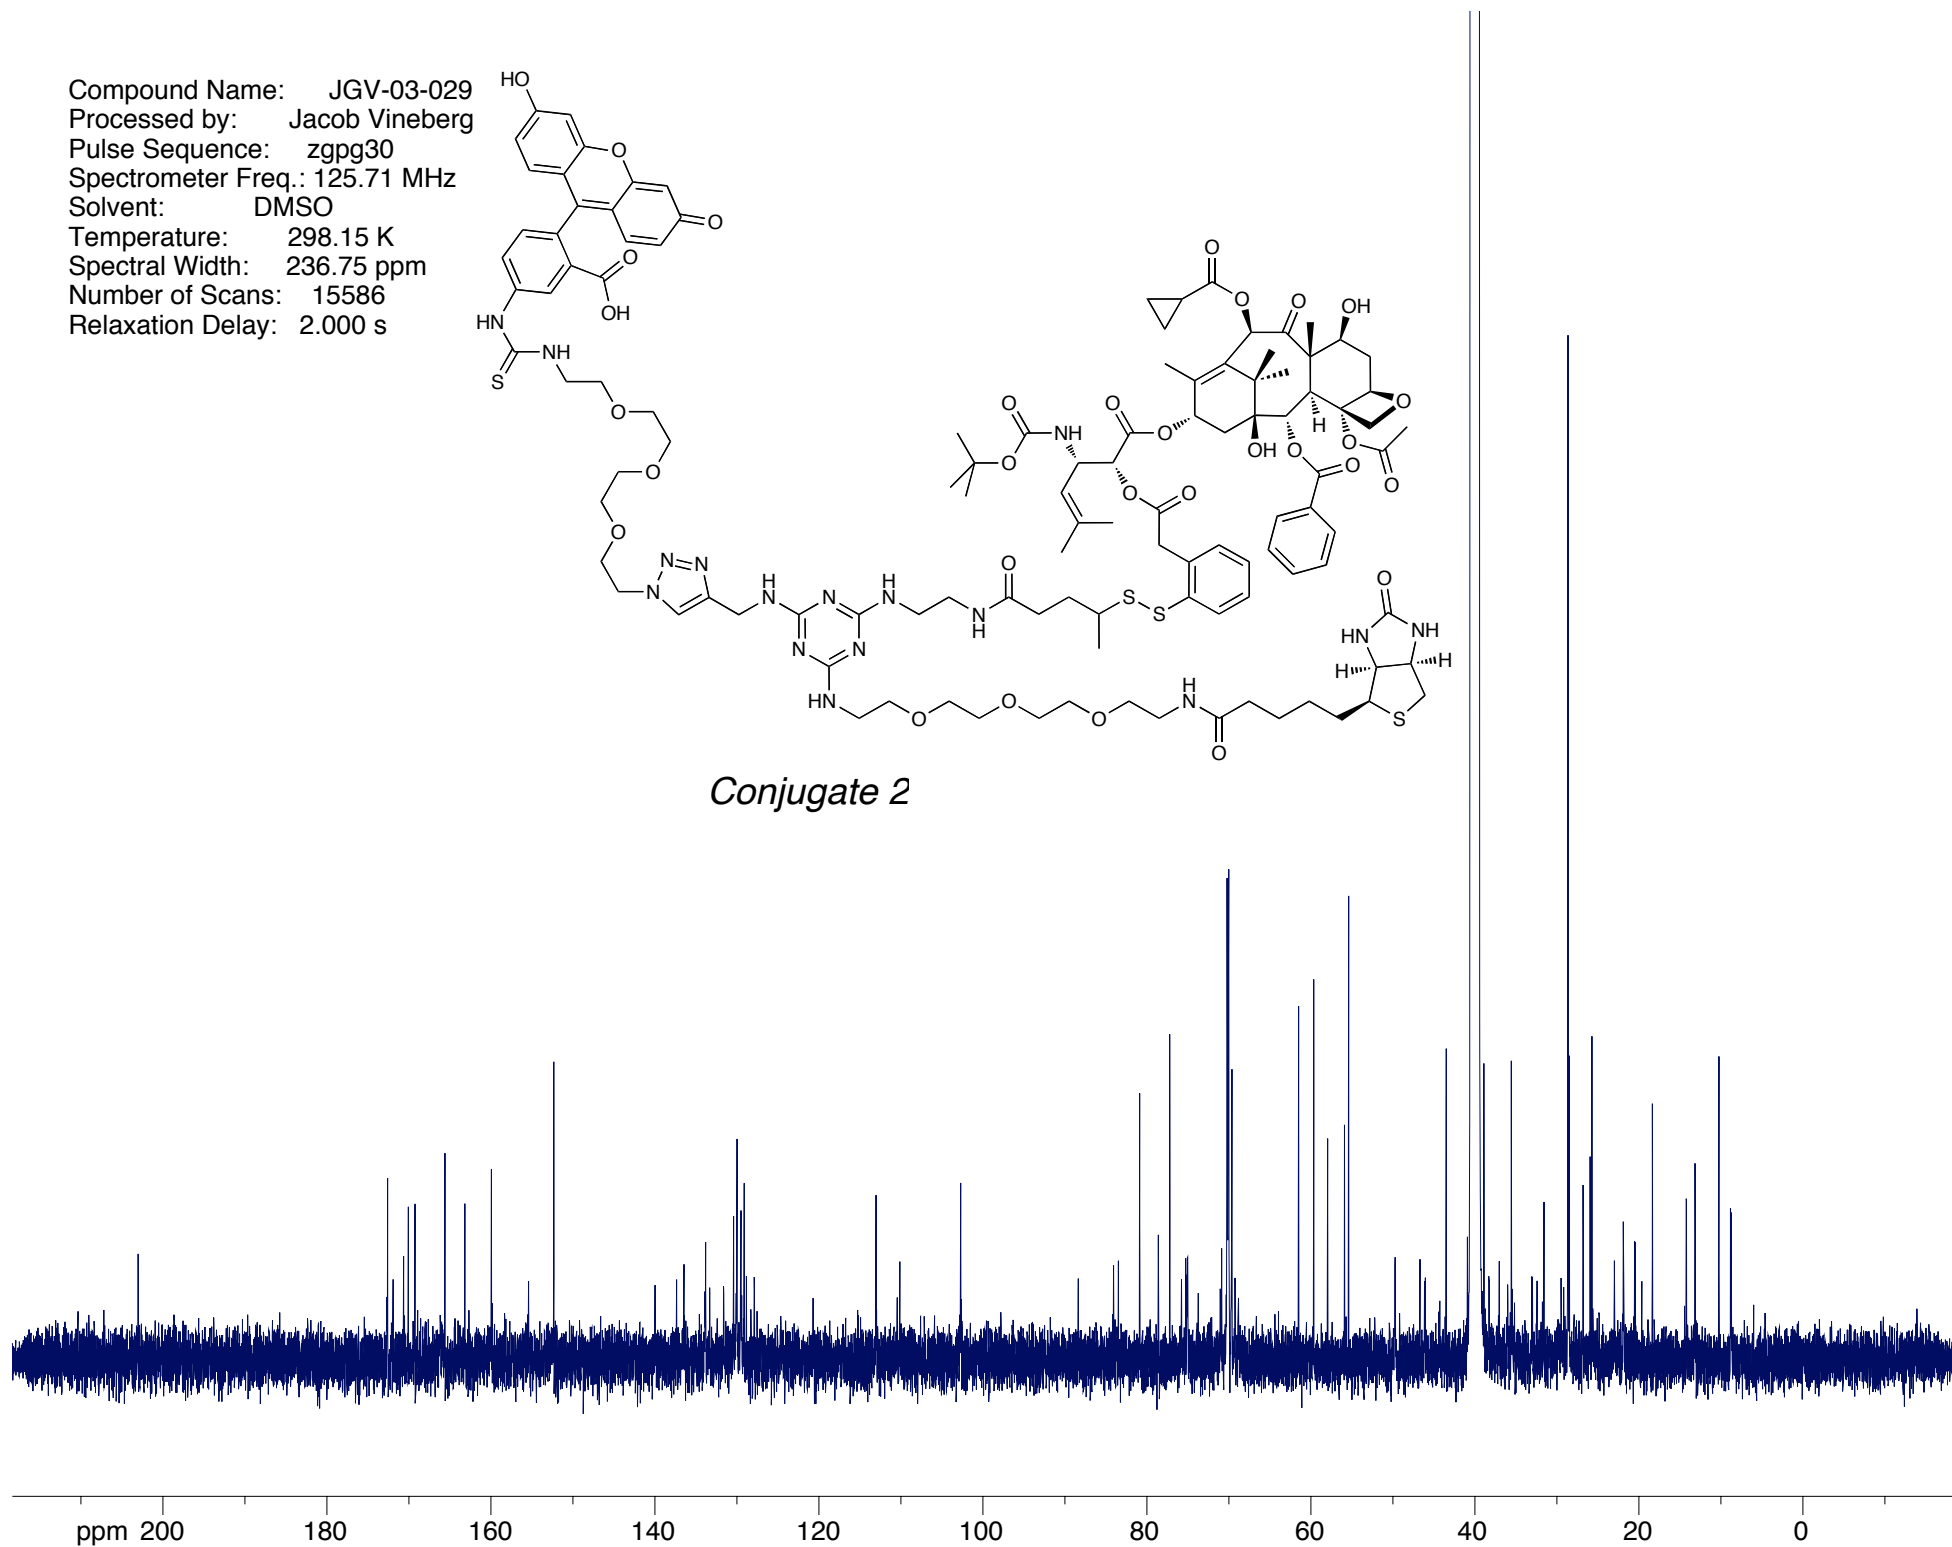

Compound Name: TW-2  
Processed by: Tao Wang  
Pulse Sequence: zg30  
Spectrometer Freq.: 499.89 MHz  
Solvent: CDCl<sub>3</sub>  
Temperature: 298.15 K  
Spectral Width: 20.00 ppm  
Number of Scans: 32  
Relaxation Delay: 1.000 s

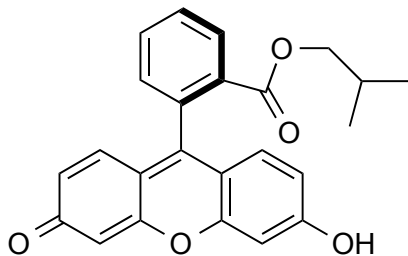

*Compound 13*

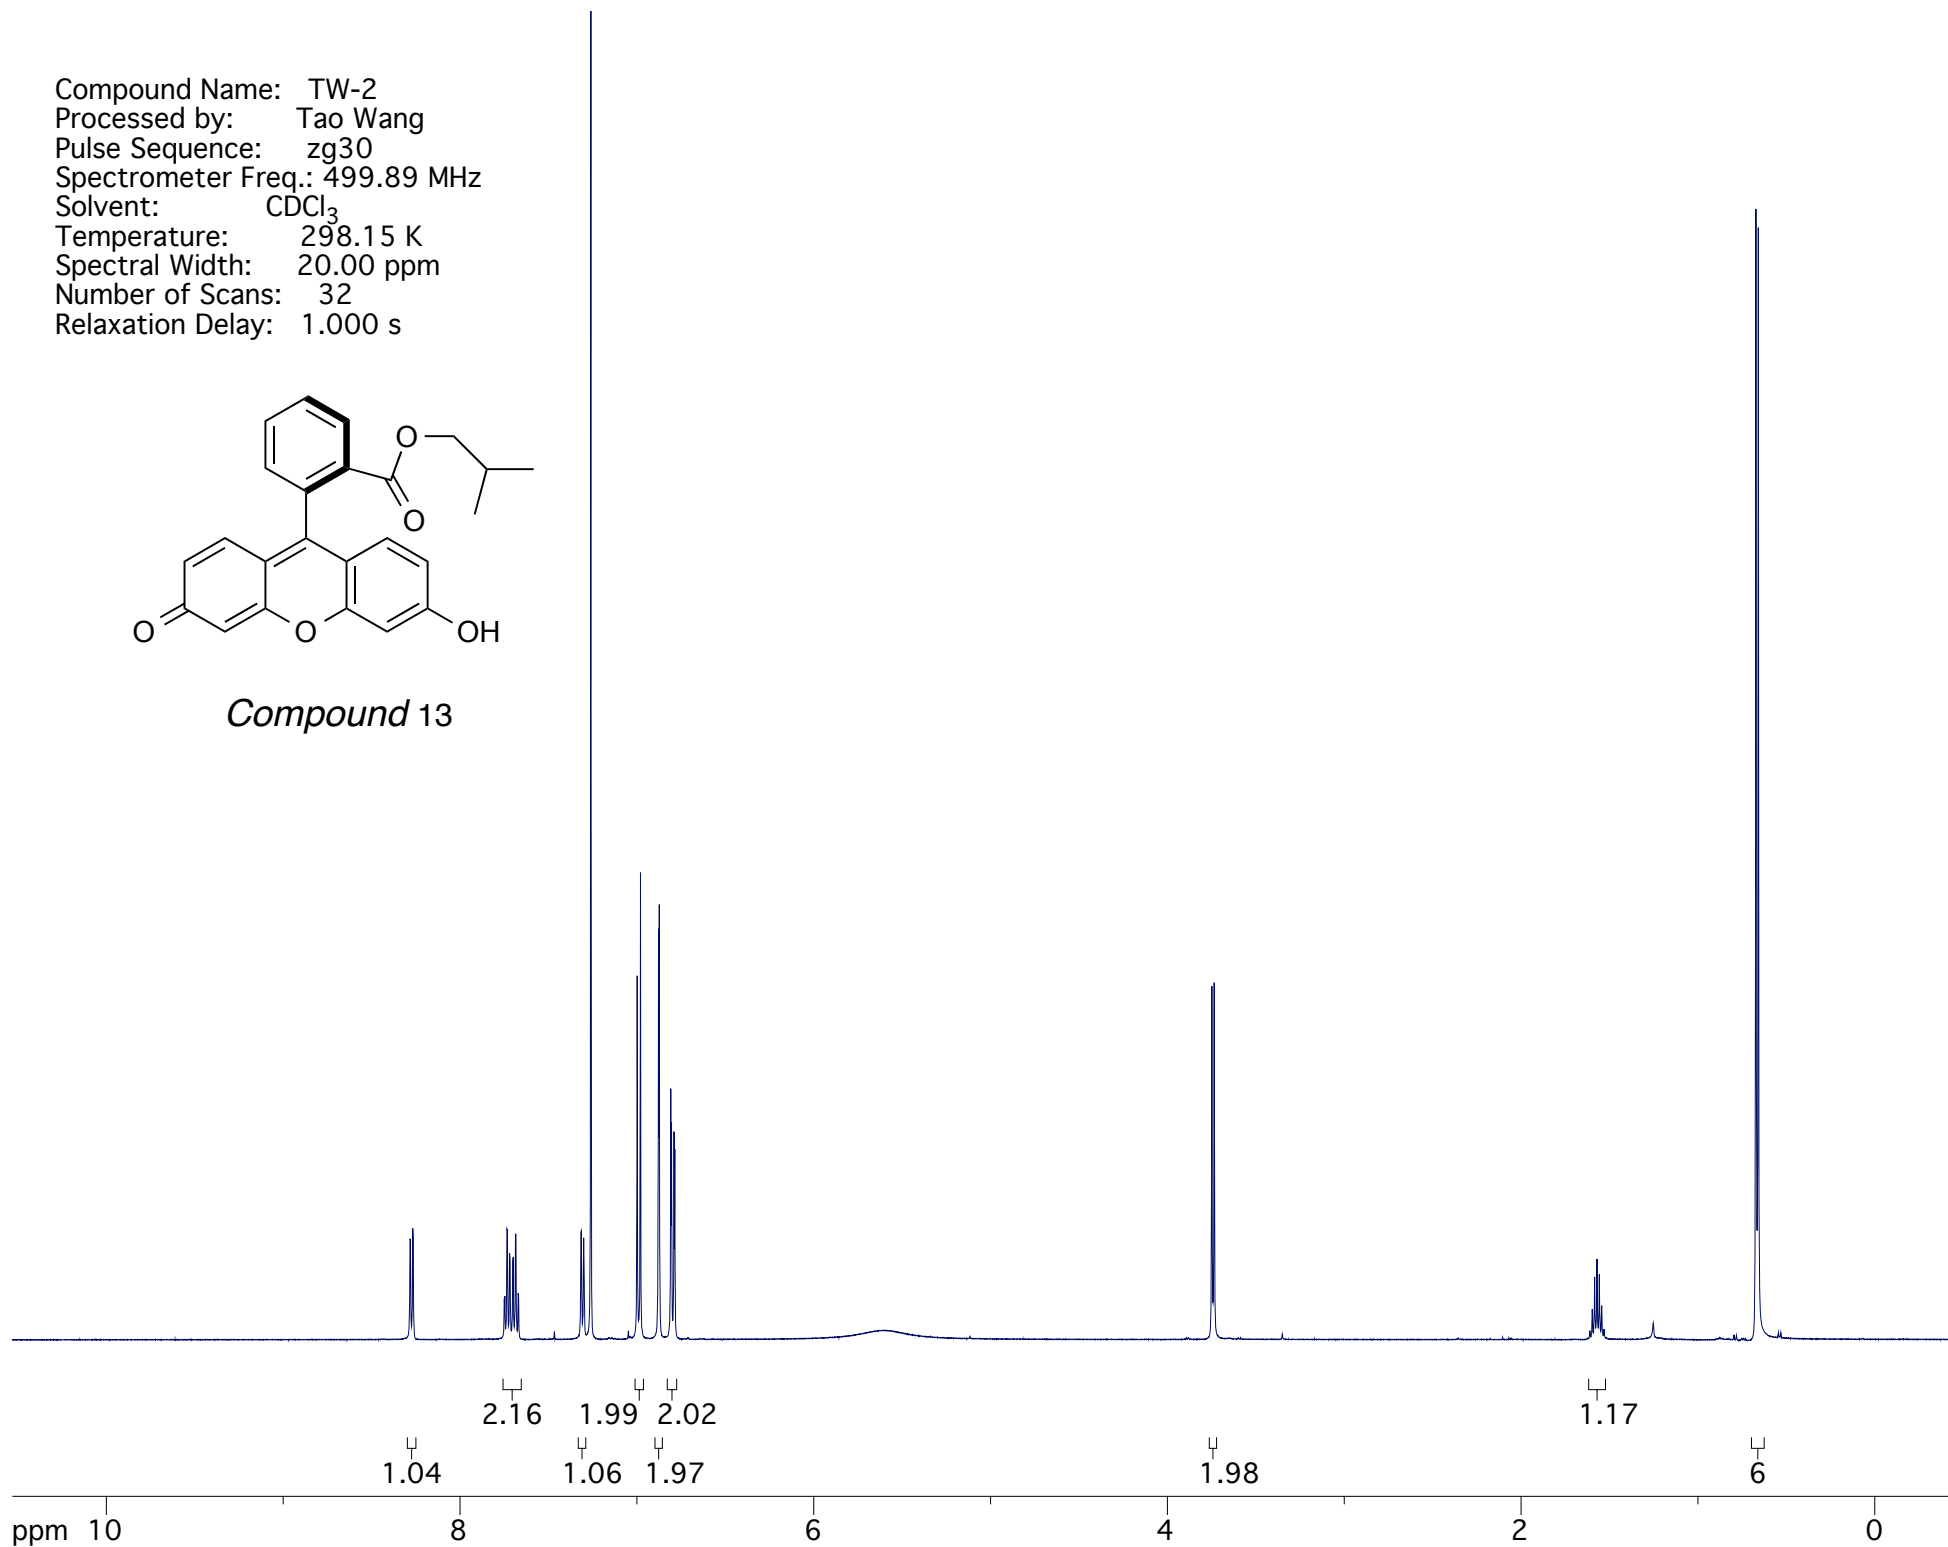

Compound Name: TW-2  
Processed by: Tao Wang  
Pulse Sequence: zgpg30  
Spectrometer Freq.: 125.71 MHz  
Solvent: CDCl<sub>3</sub>  
Temperature: 298.15 K  
Spectral Width: 236.75 ppm  
Number of Scans: 722  
Relaxation Delay: 2.000 s

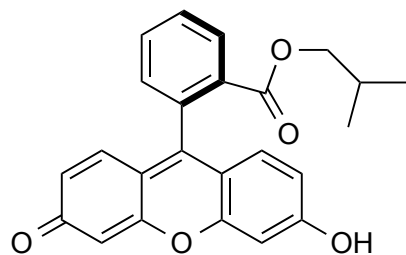

*Compound 13*

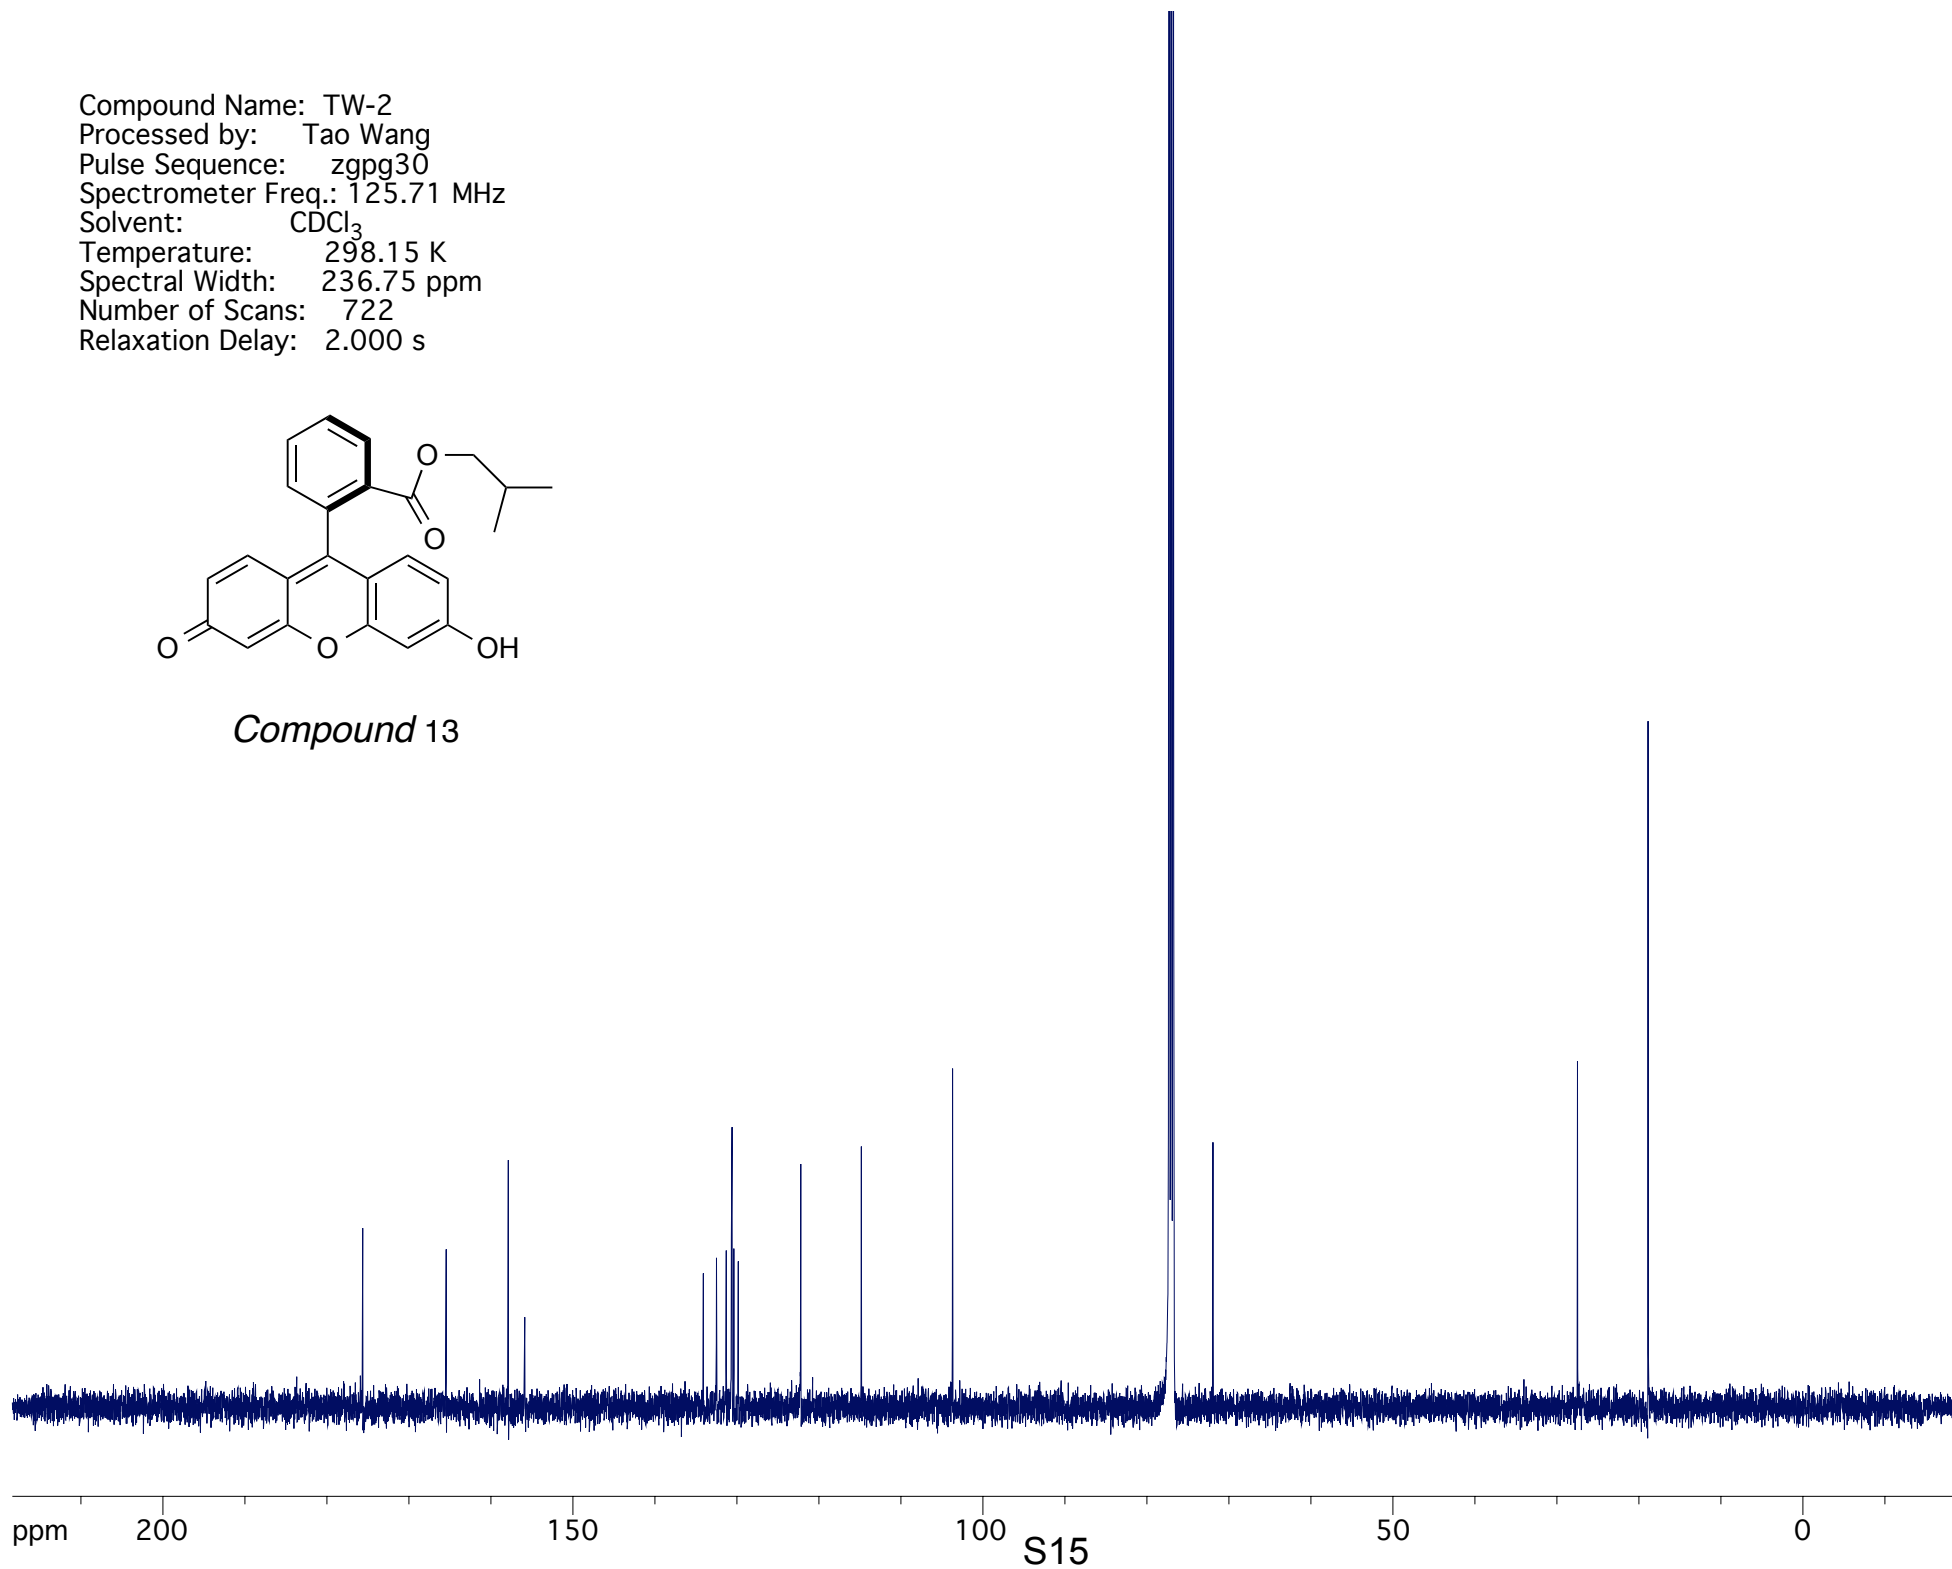

Compound Name: TW-3  
Processed by: Tao Wang  
Pulse Sequence: zg30  
Spectrometer Freq: 499.89 MHz  
Solvent: DMSO- $d_6$   
Temperature: 298.2 K  
Spectral Width: 20.0 ppm  
Number of Scans: 64  
Relaxation Delay: 1.0000 s

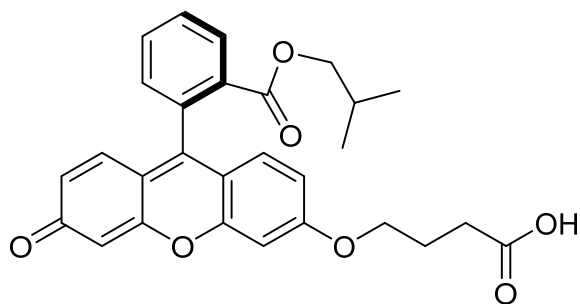

**Compound 14**

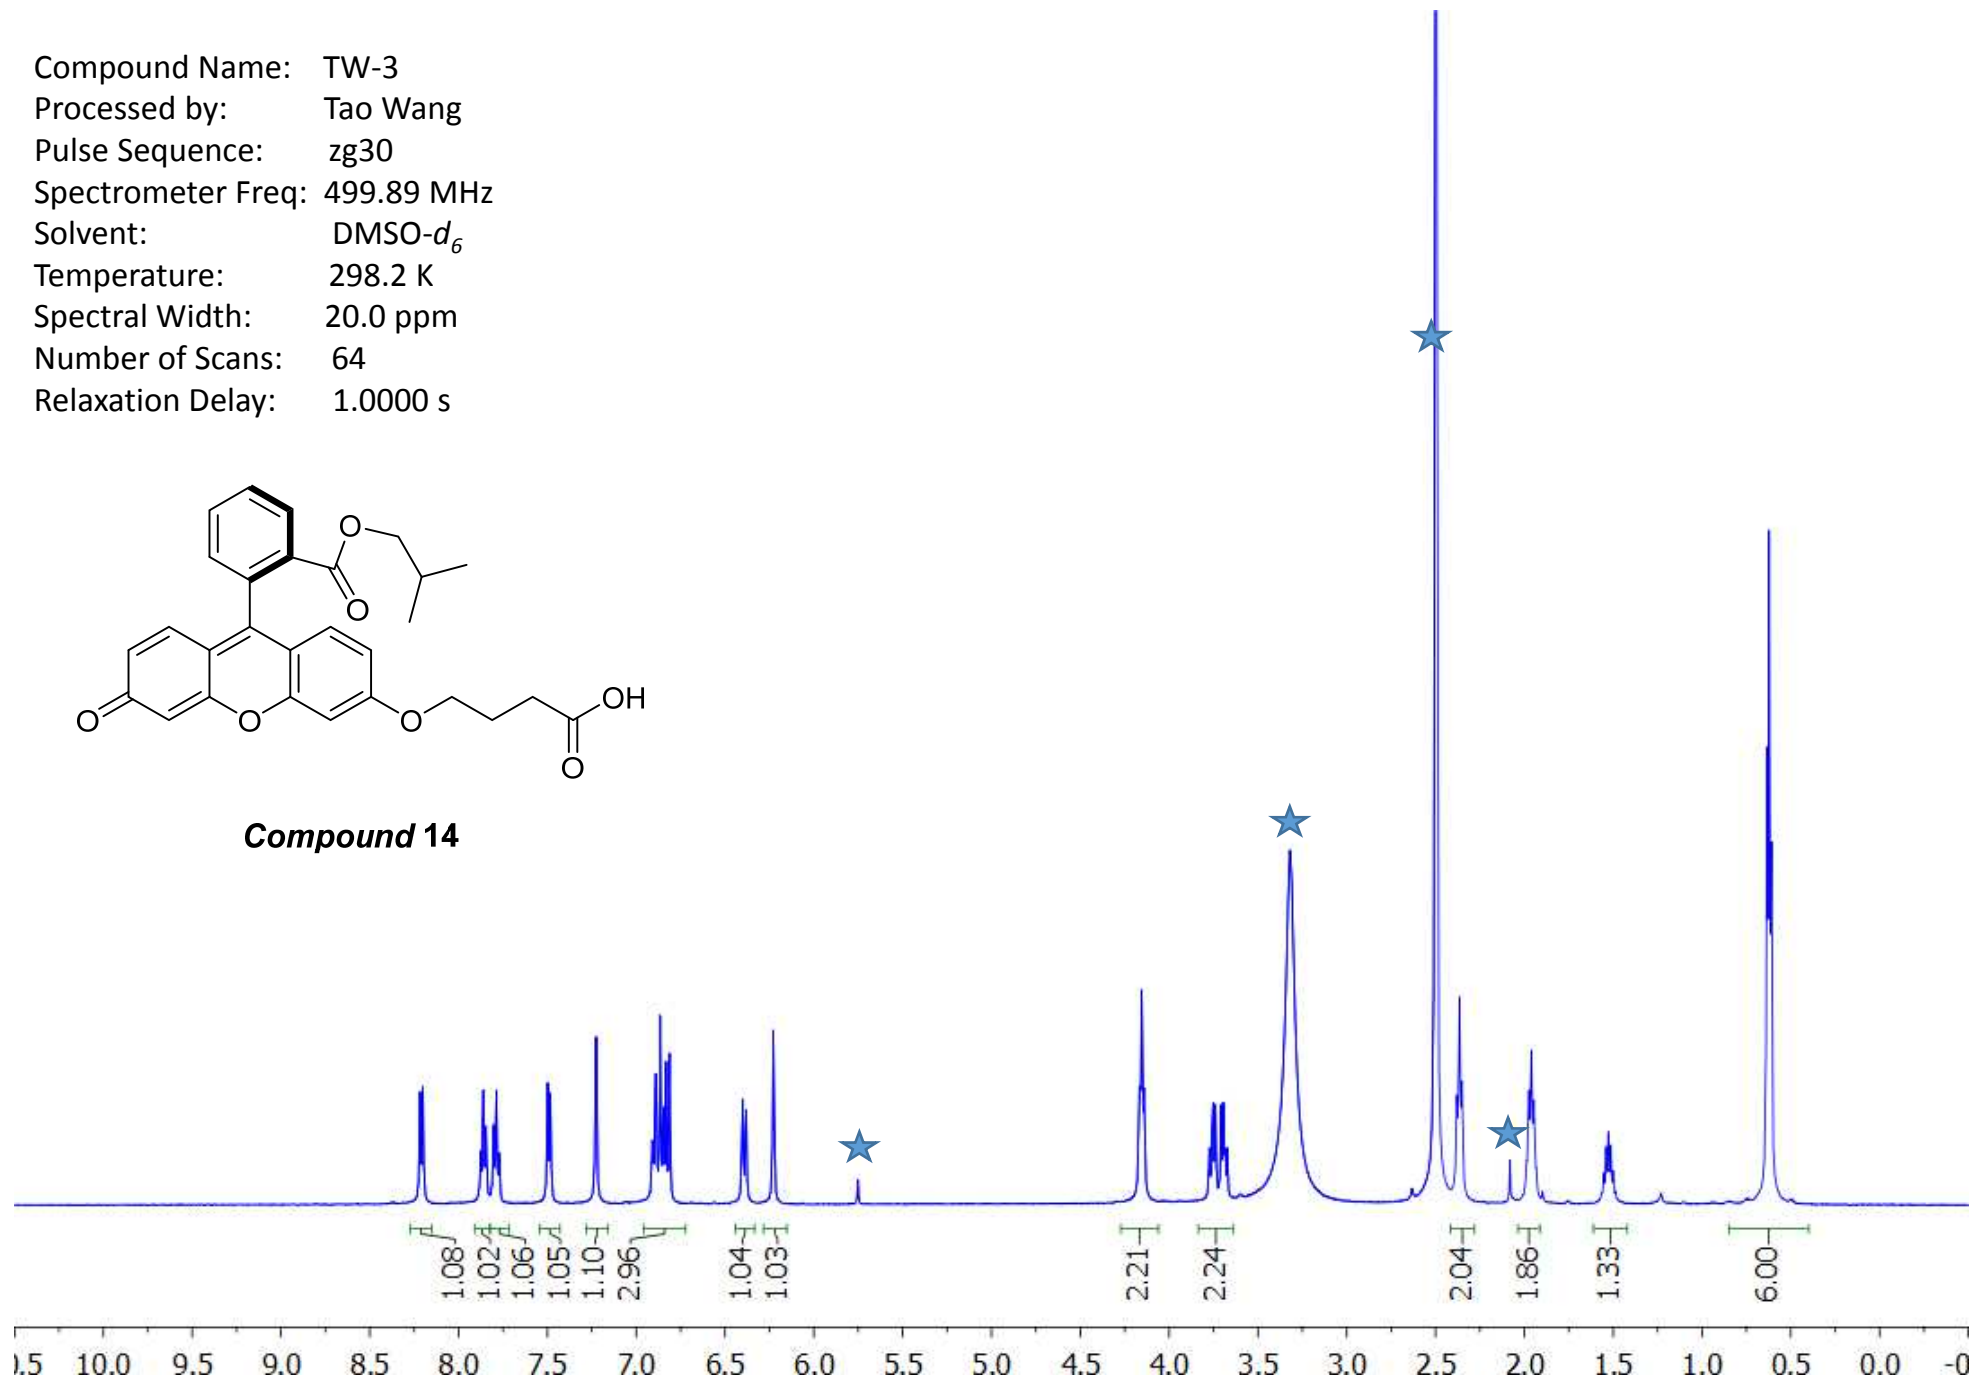

★ Peaks arising from the solvent used: DMSO- $d_6$  (wet)



Compound Name: TW-3  
Processed by: Tao Wang  
Pulse Sequence: zgpg30  
Spectrometer Freq: 125.71 MHz  
Solvent: DMSO-*d*<sub>6</sub>  
Temperature: 298.1 K  
Spectral Width: 236.75 ppm  
Number of Scans: 19324  
Relaxation Delay: 2.0000 s

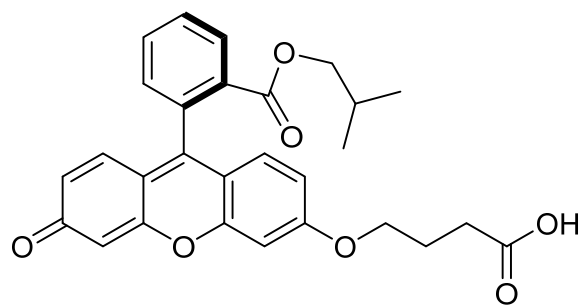

**Compound 14**

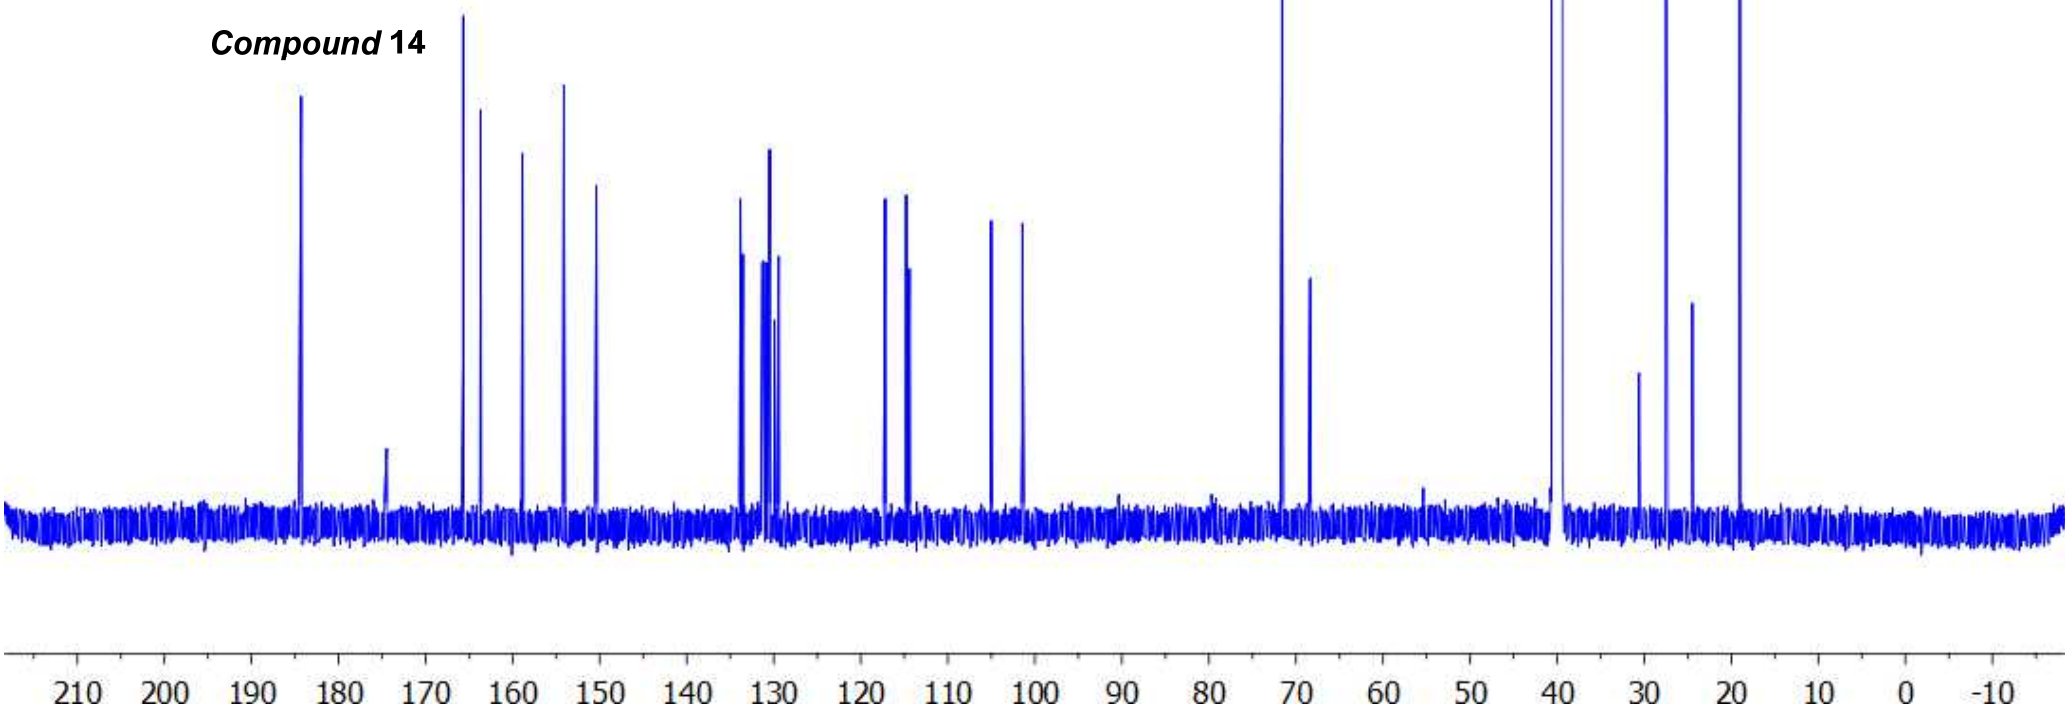

Compound Name: JGV-03-002  
Processed by: Jacob Vineberg  
Pulse Sequence: zg30  
Spectrometer Freq.: 499.89 MHz  
Solvent: CDCl<sub>3</sub>  
Temperature: 298.15 K  
Spectral Width: 20.00 ppm  
Number of Scans: 49  
Relaxation Delay: 1.000 s

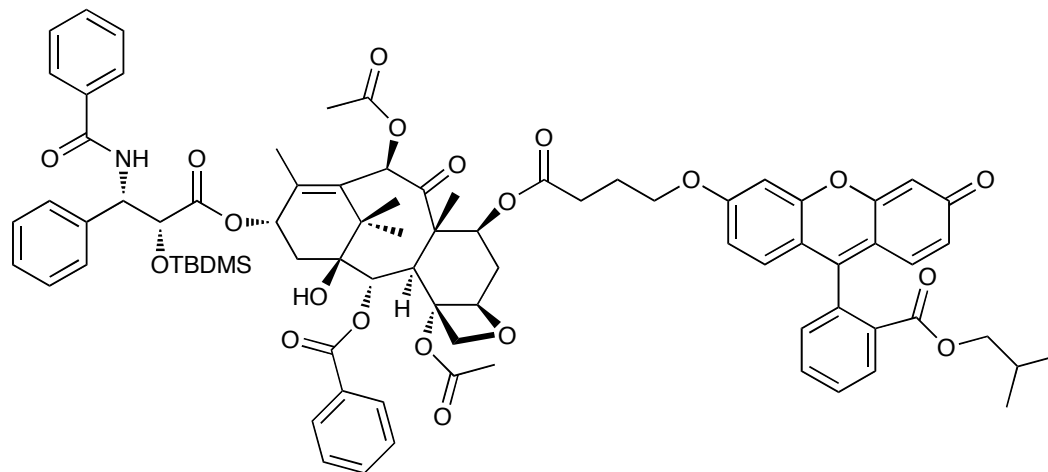

Compound 15

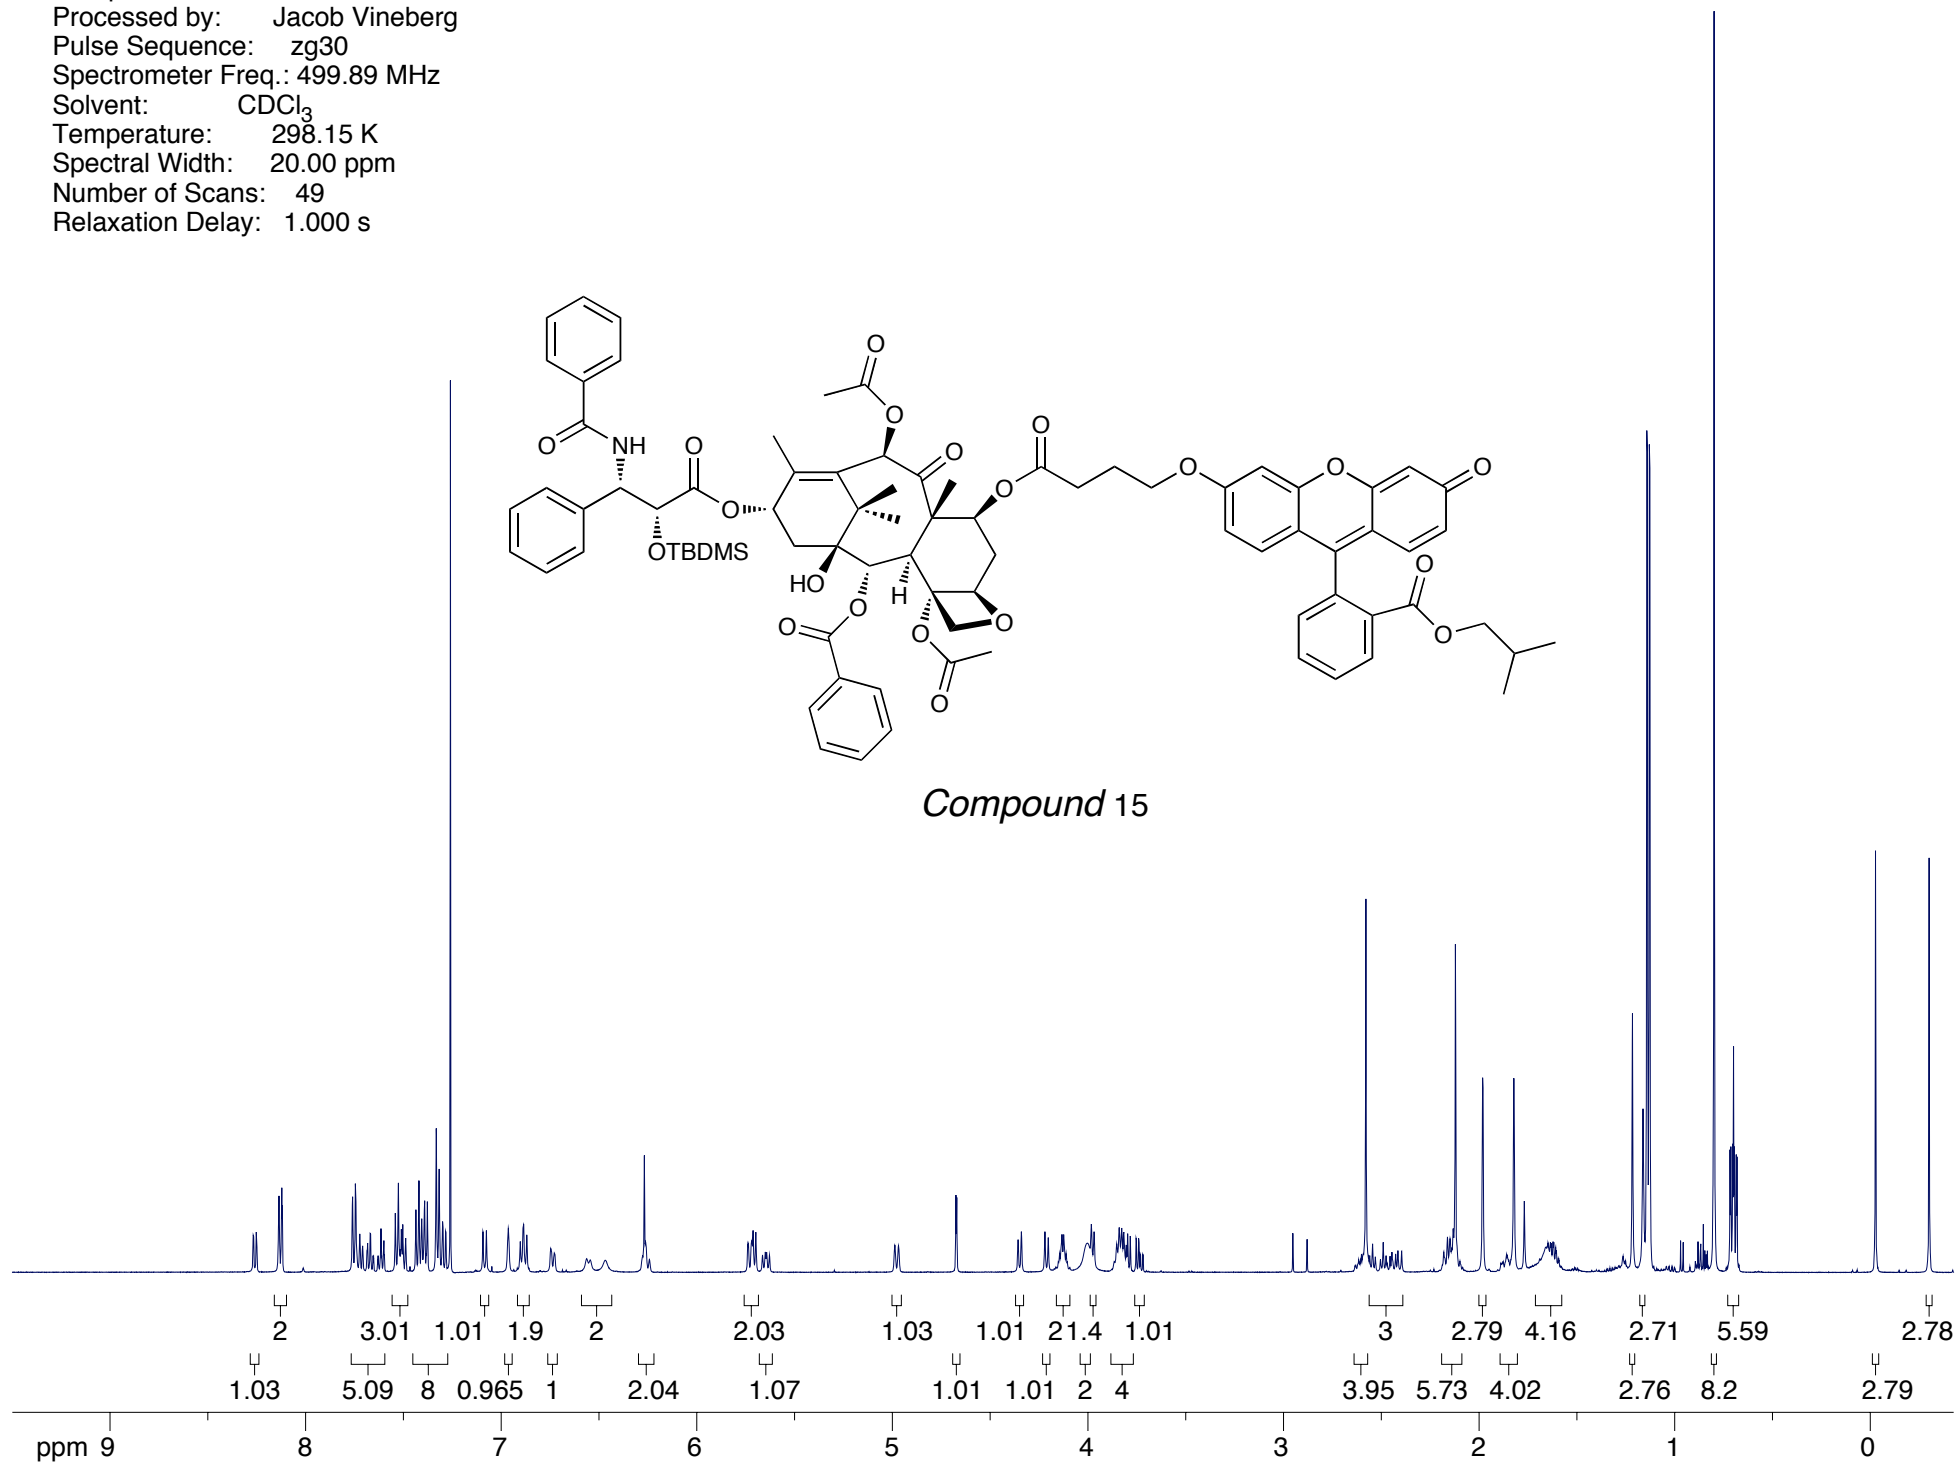

Compound Name: JGV-03-002-<sup>13</sup>C  
Processed by: Jacob Vineberg  
Pulse Sequence: zgpg30  
Spectrometer Freq.: 125.71 MHz  
Solvent: CDCl<sub>3</sub>  
Temperature: 298.15 K  
Spectral Width: 236.75 ppm  
Number of Scans: 2137  
Relaxation Delay: 2.000 s

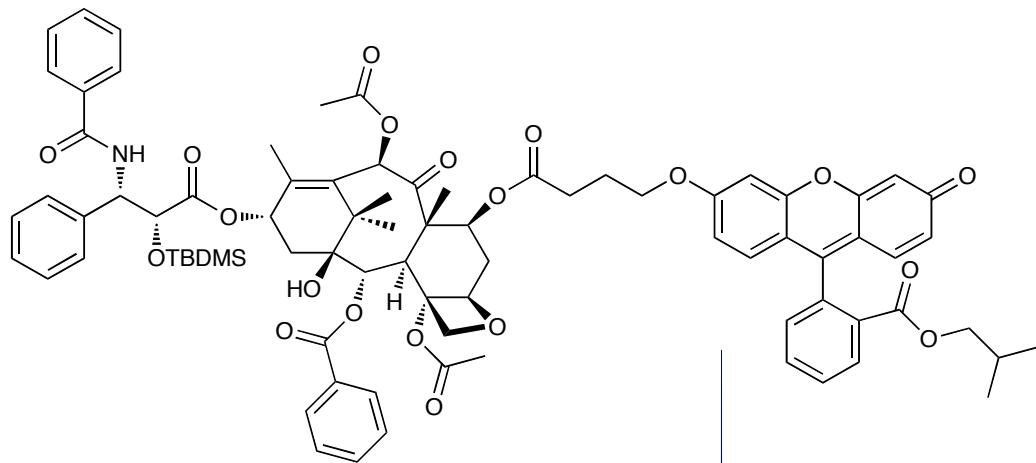

*Compound 15*

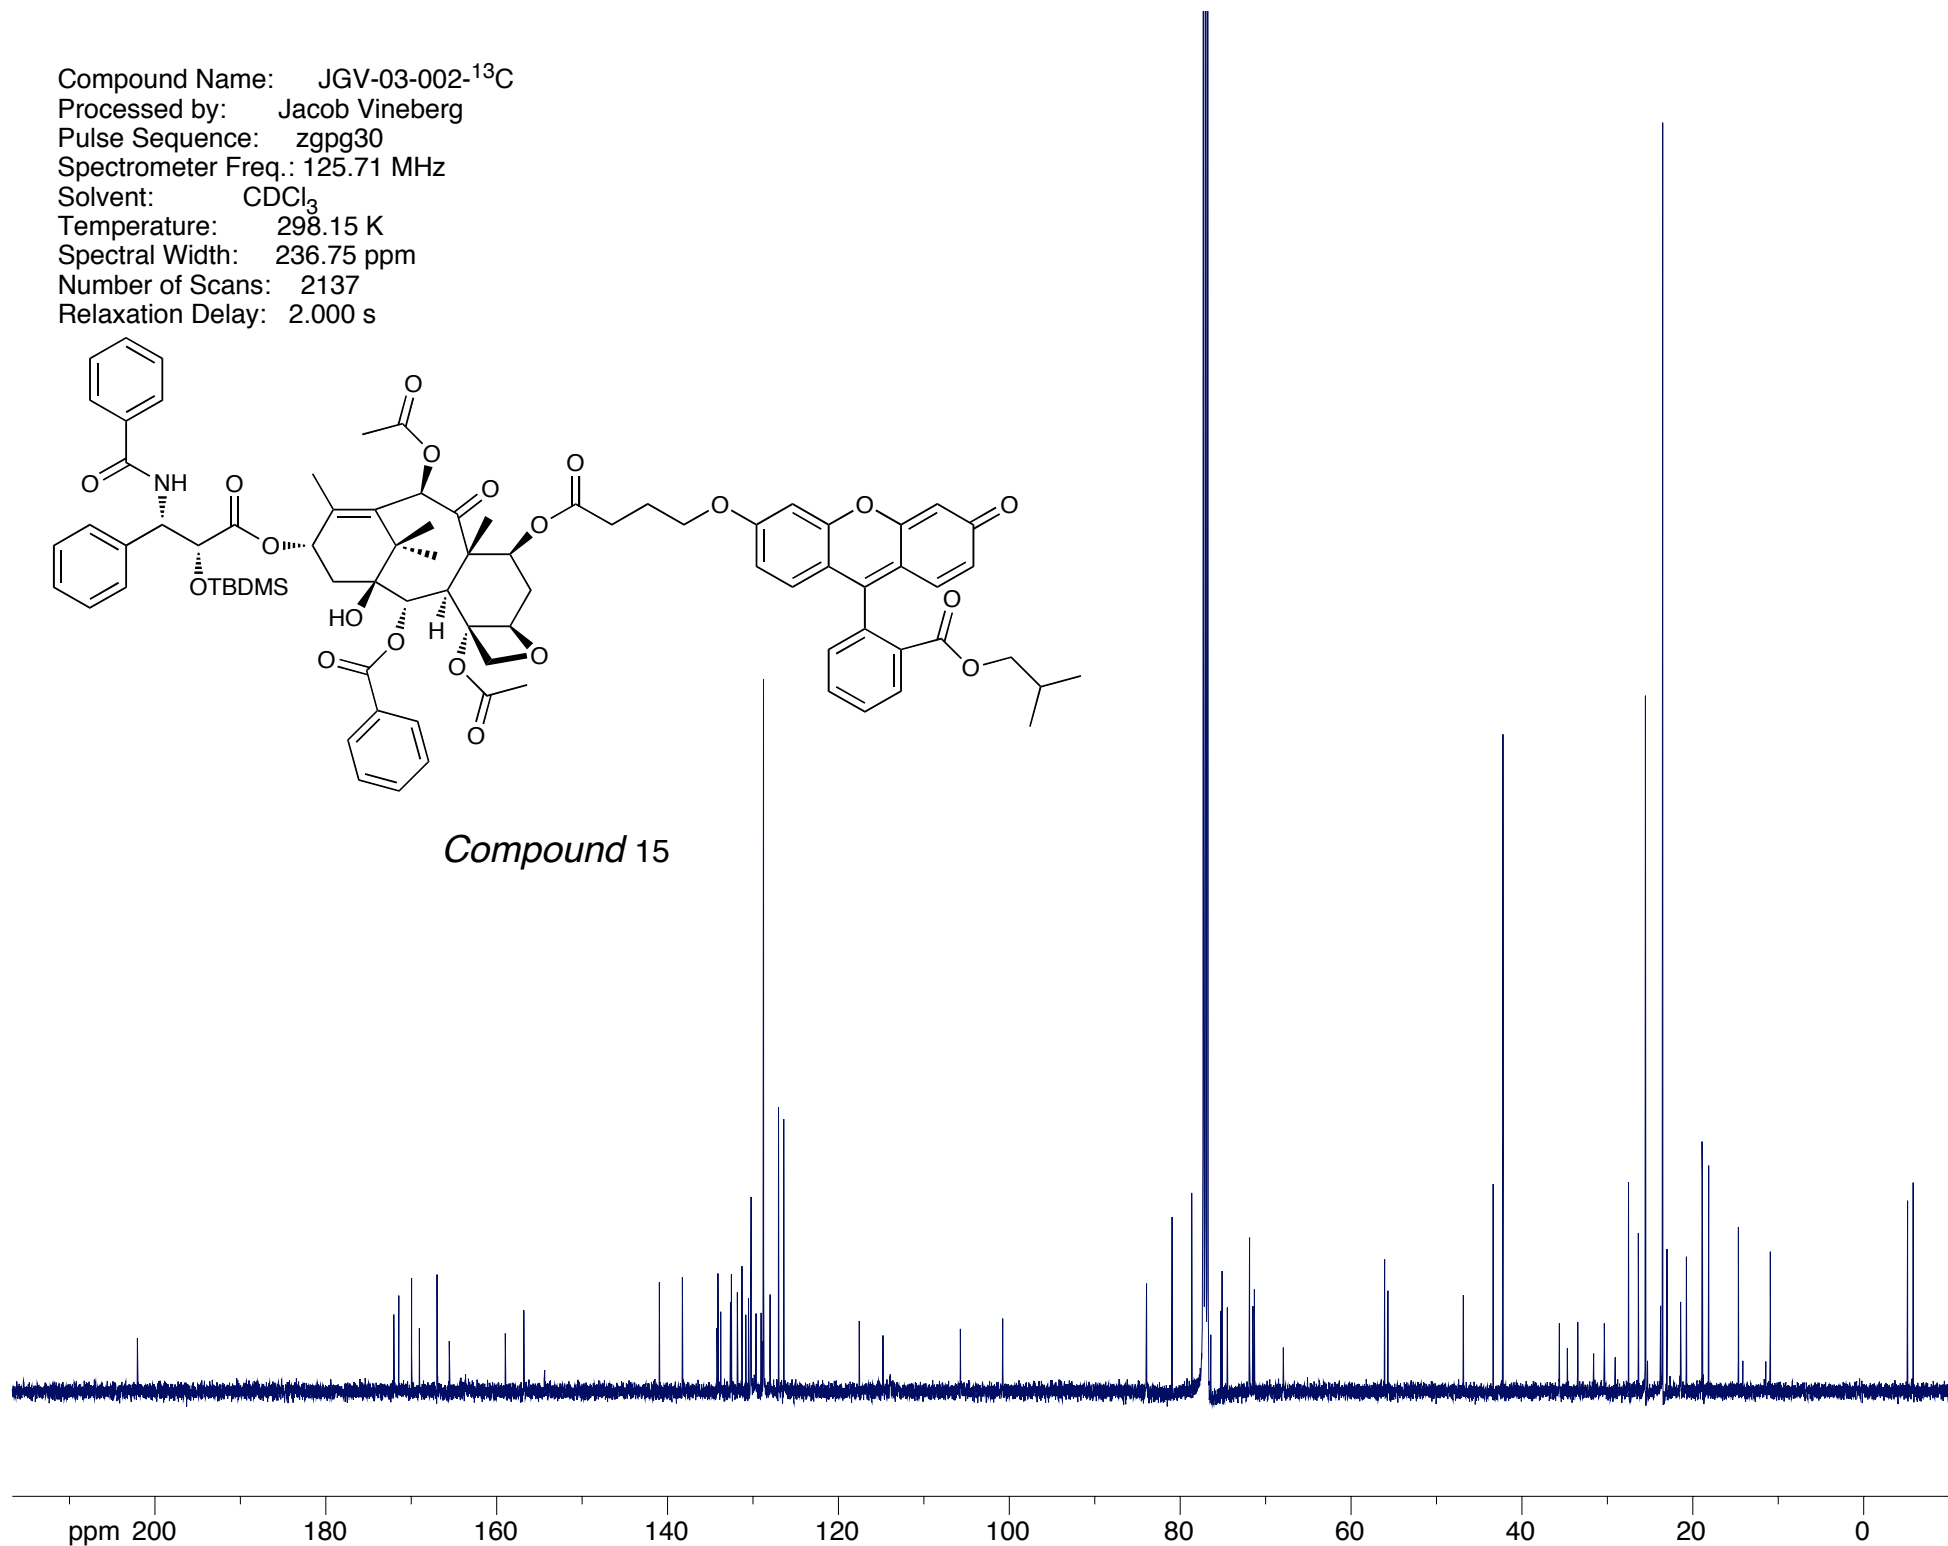

Compound Name: JGV-03-003  
Processed by: Jacob Vineberg  
Pulse Sequence: zg30  
Spectrometer Freq.: 499.89 MHz  
Solvent: CDCl<sub>3</sub>  
Temperature: 298.15 K  
Spectral Width: 20.00 ppm  
Number of Scans: 84  
Relaxation Delay: 1.000 s

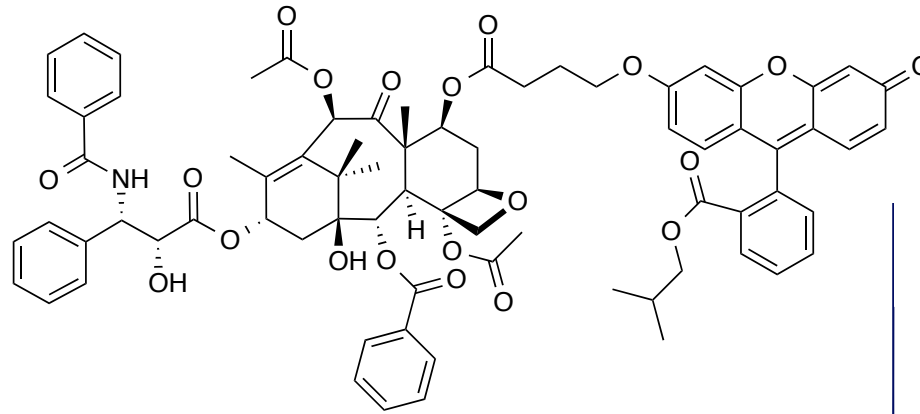

*Compound 6*

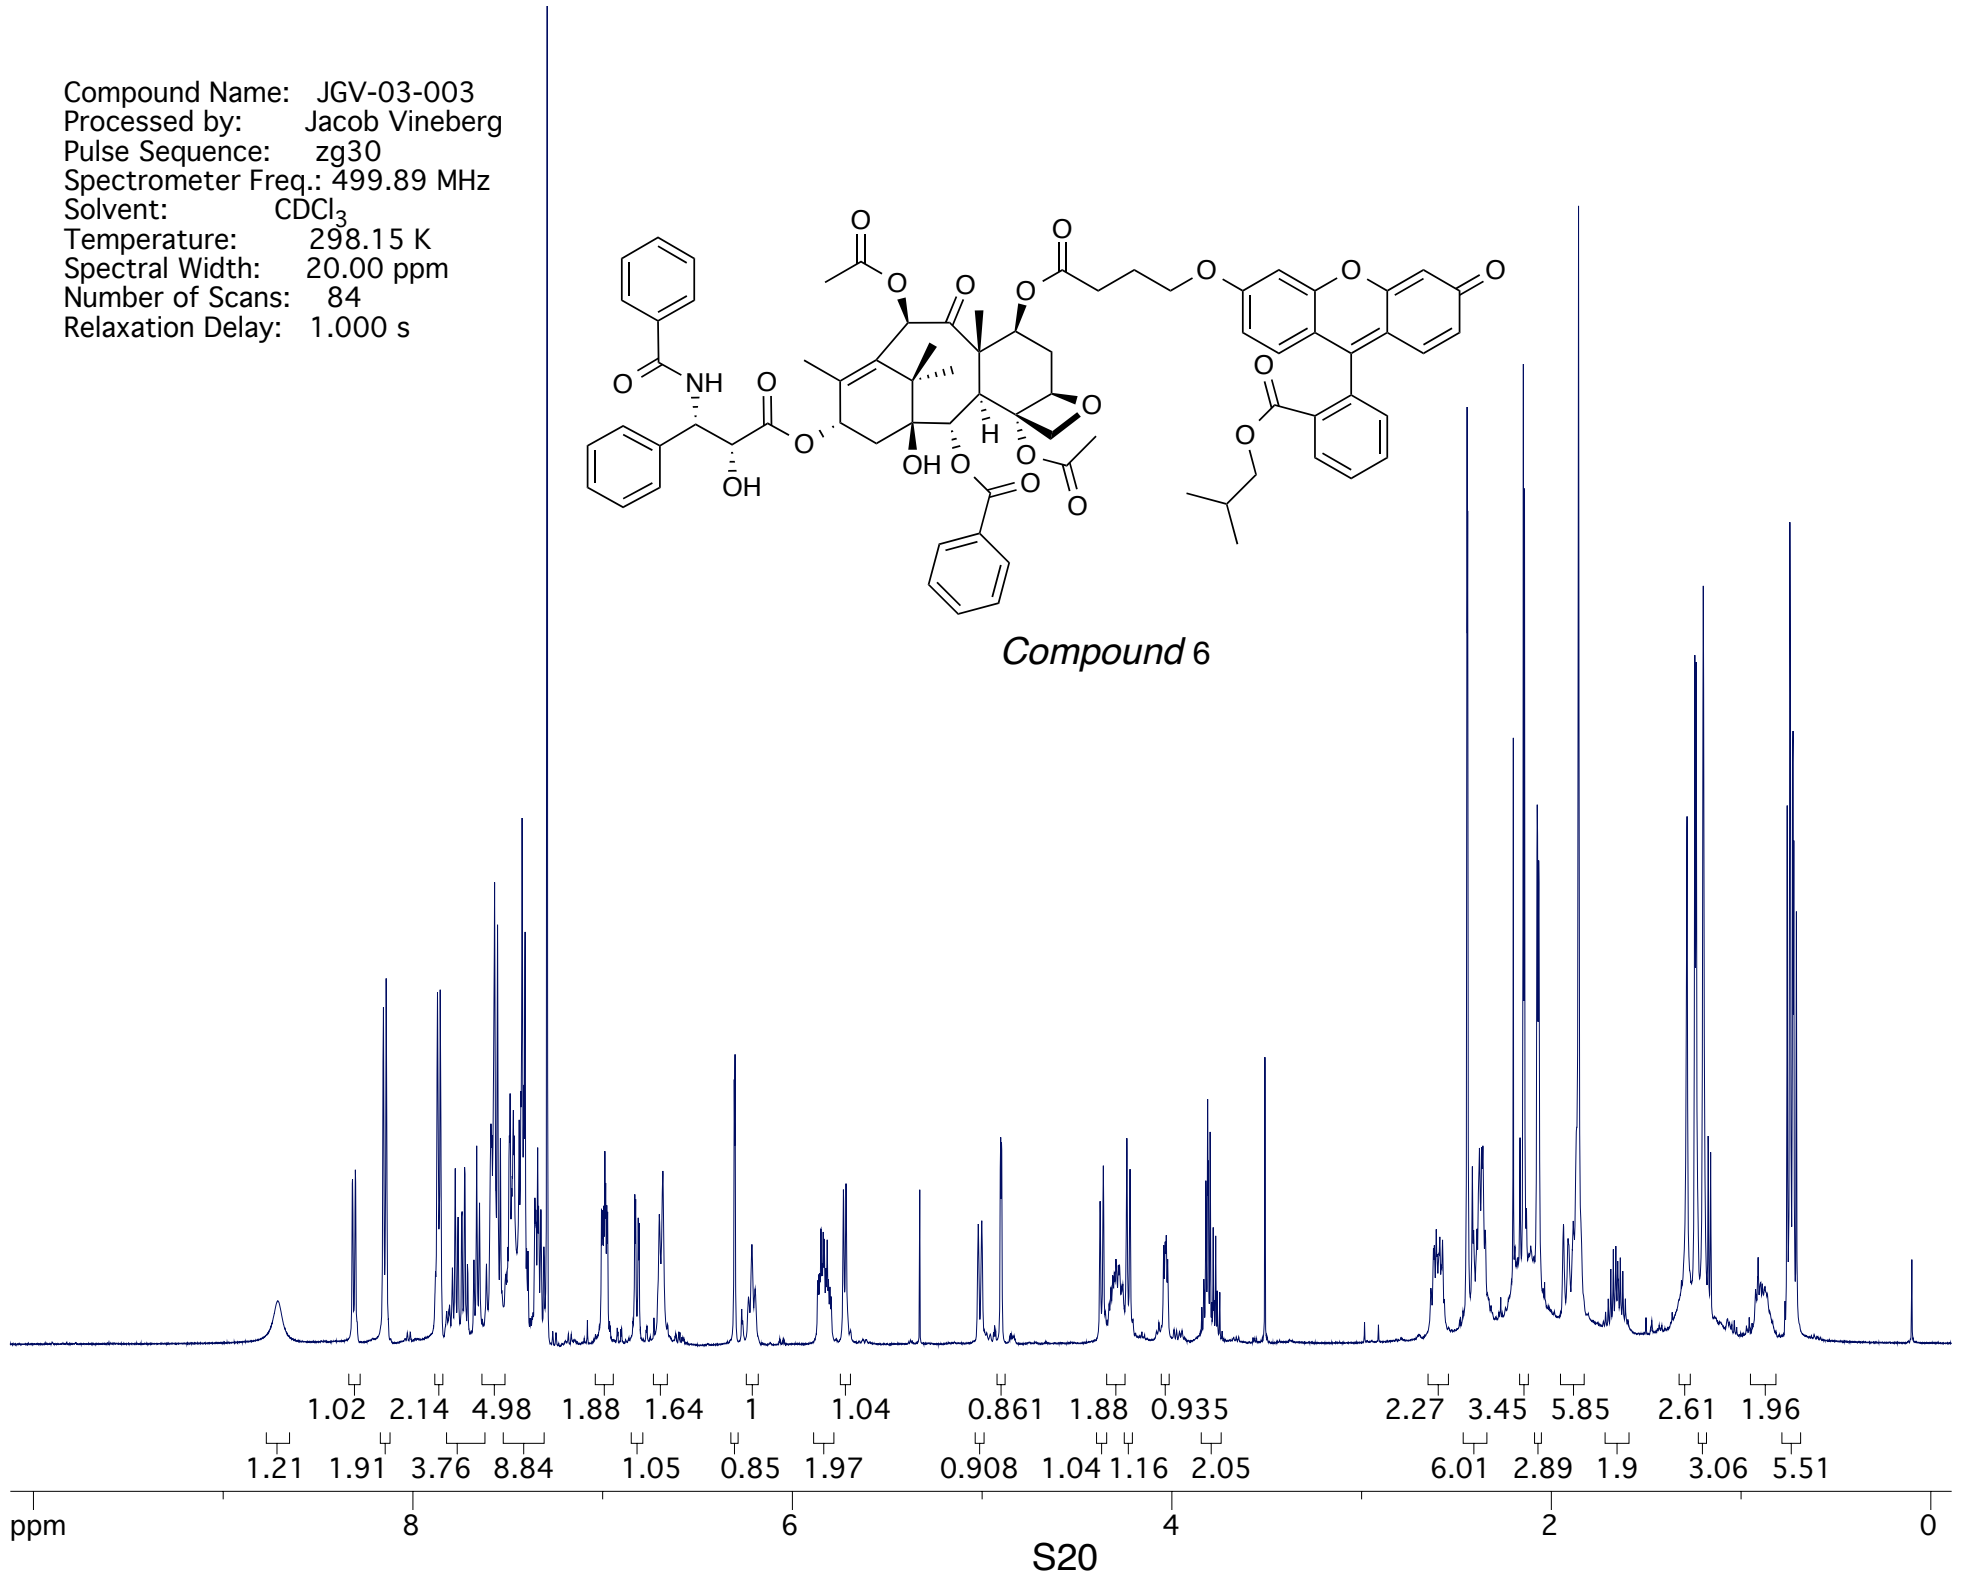

Compound Name: JGV-03-003-<sup>13</sup>C  
Processed by: Jacob Vineberg  
Pulse Sequence: zgpg30  
Spectrometer Freq.: 125.71 MHz  
Solvent: CDCl<sub>3</sub>  
Temperature: 298.15 K  
Spectral Width: 236.75 ppm  
Number of Scans: 4256  
Relaxation Delay: 2.000 s

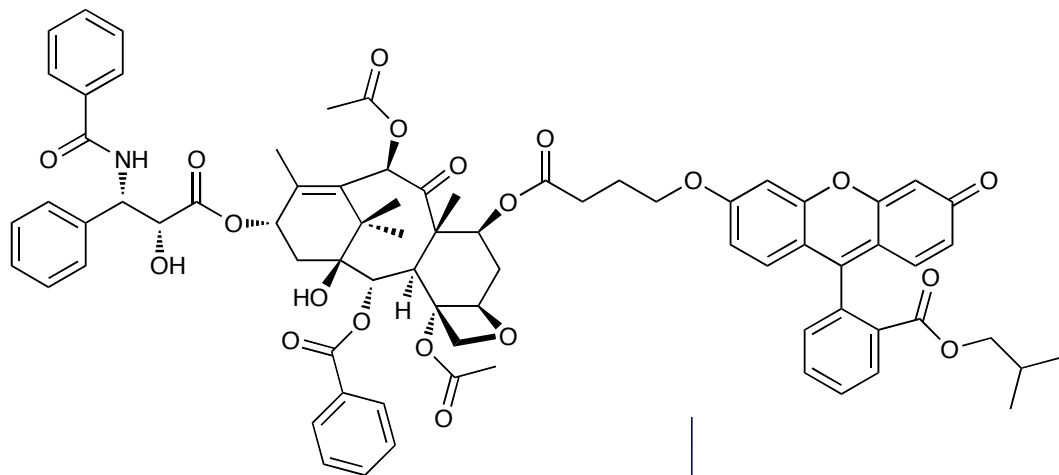

*Compound 6*

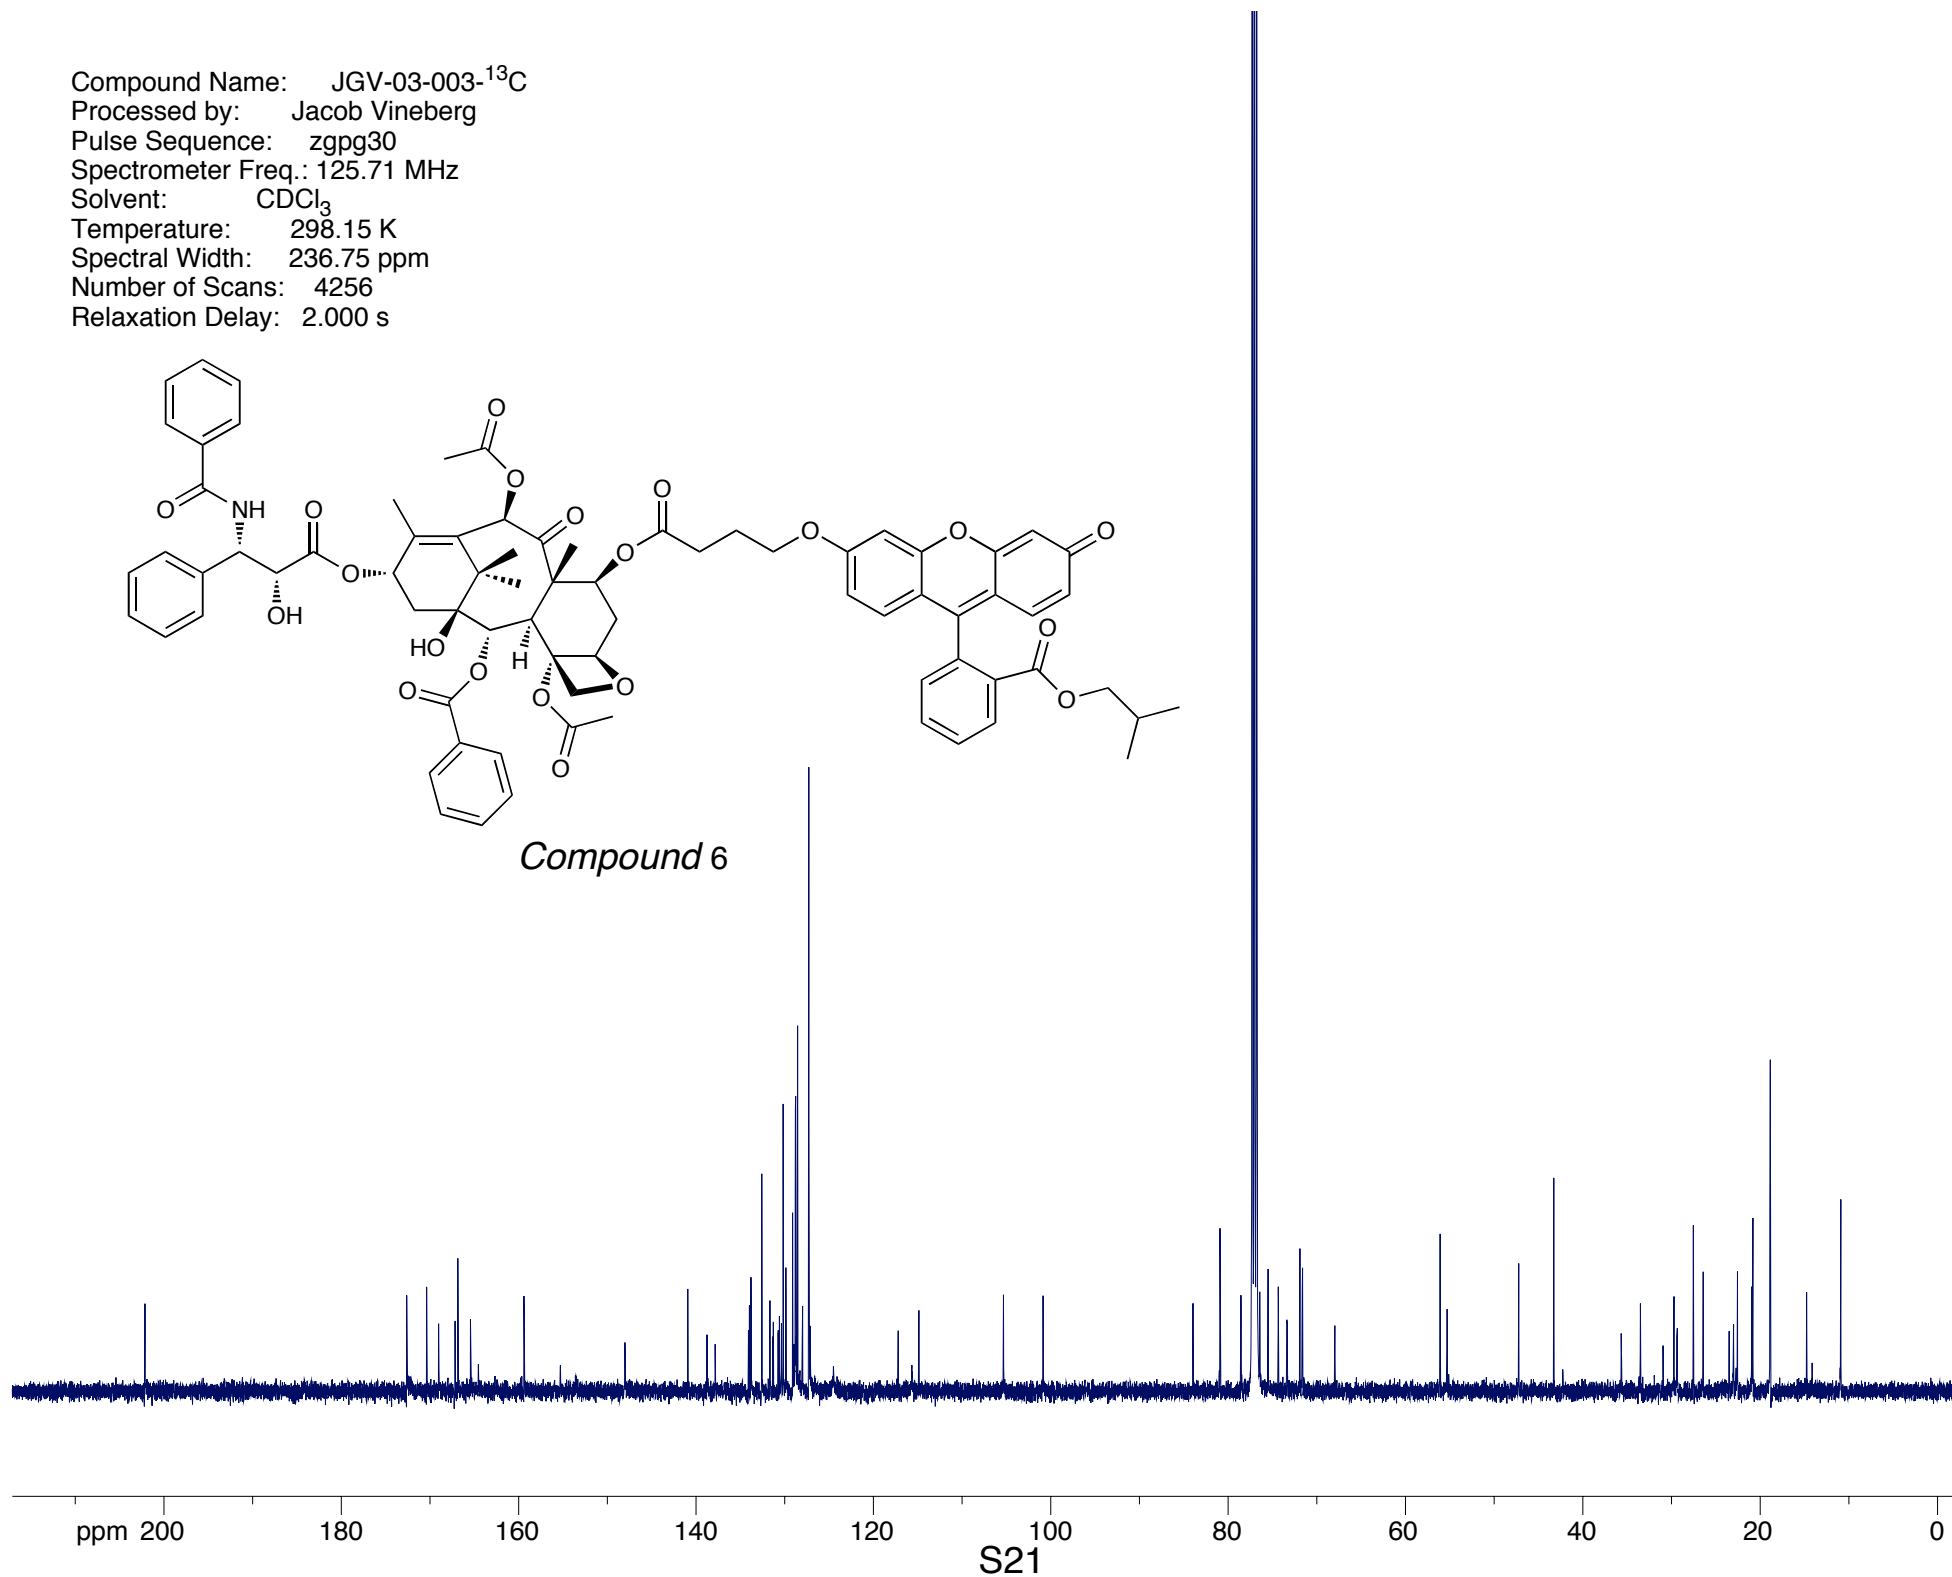

Compound Name: JGV-02-033  
Processed by: Jacob Vineberg  
Pulse Sequence: zg30  
Spectrometer Freq.: 399.83 MHz  
Solvent: MeOD  
Temperature: 298.15 K  
Spectral Width: 20.57 ppm  
Number of Scans: 57  
Relaxation Delay: 1.000 s

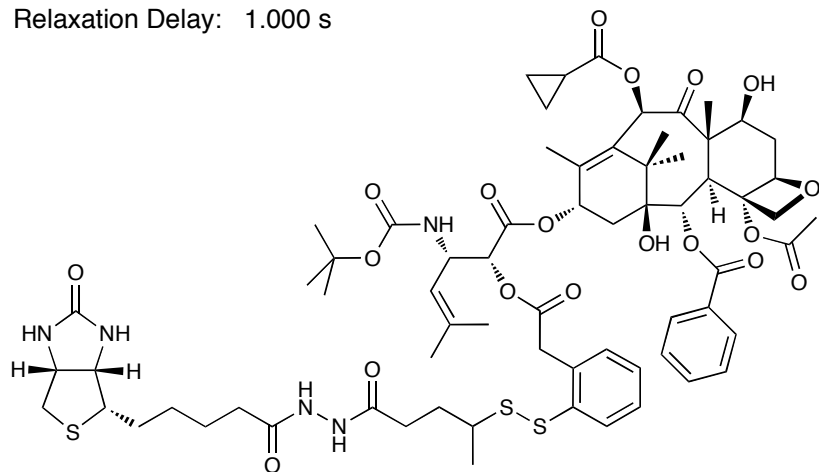

*Compound 4*

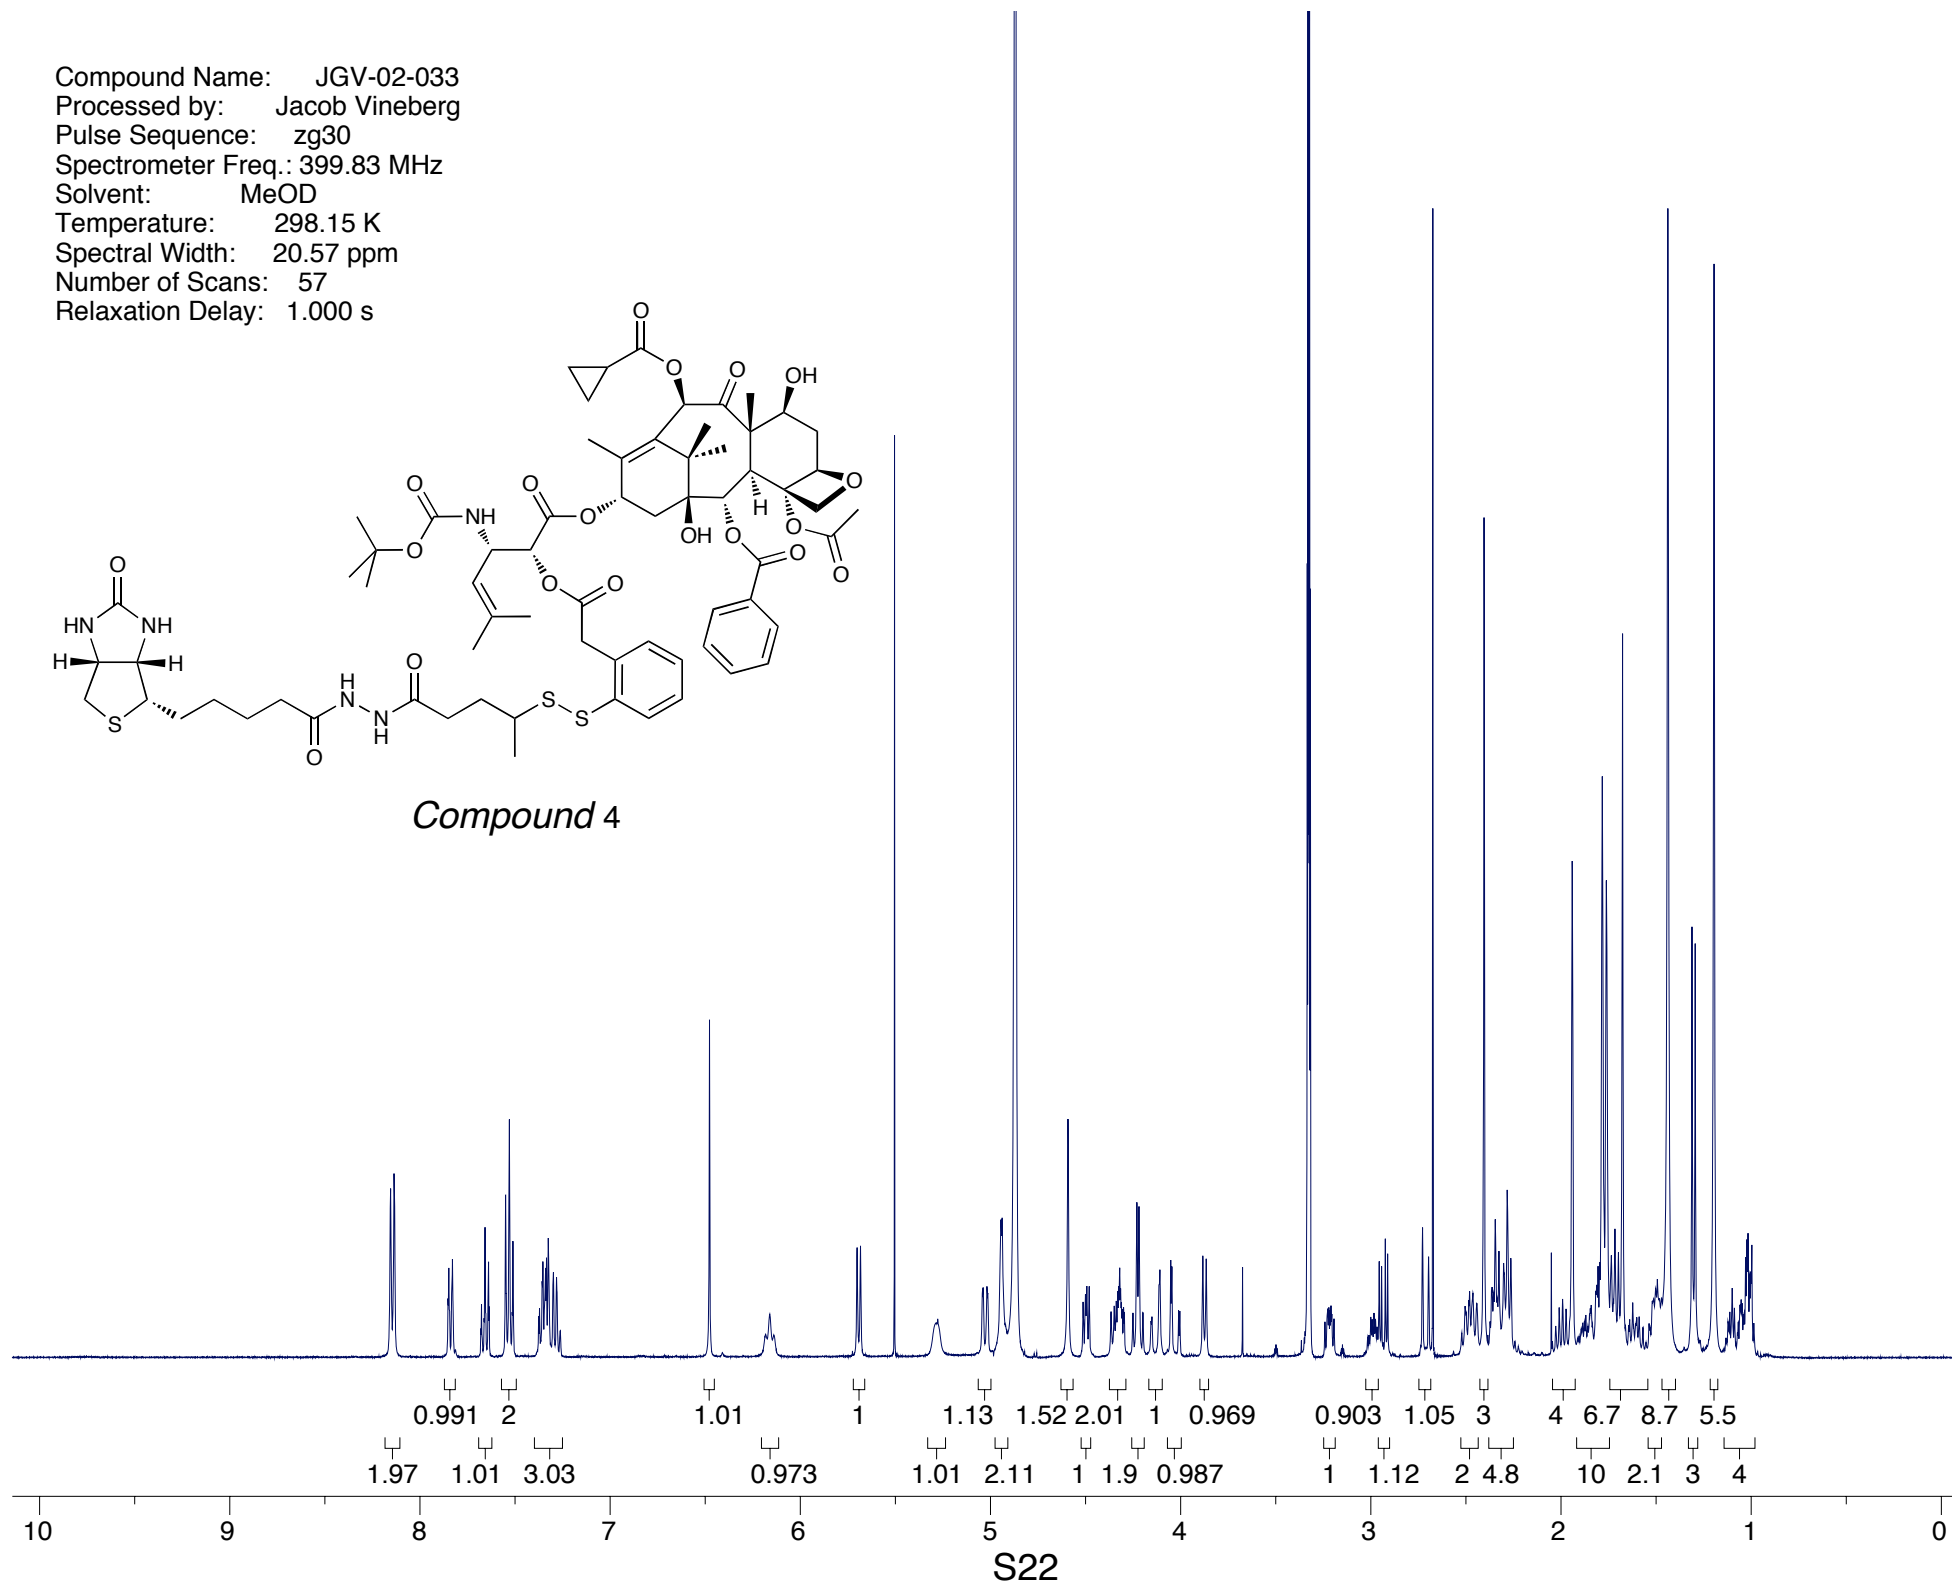

Compound Name: JGV-02-033-<sup>13</sup>C  
Processed by: Jacob Vineberg  
Pulse Sequence: zgpg30  
Spectrometer Freq.: 125.71 MHz  
Solvent: MeOD  
Temperature: 298.20 K  
Spectral Width: 236.75 ppm  
Number of Scans: 2162  
Relaxation Delay: 2.000 s

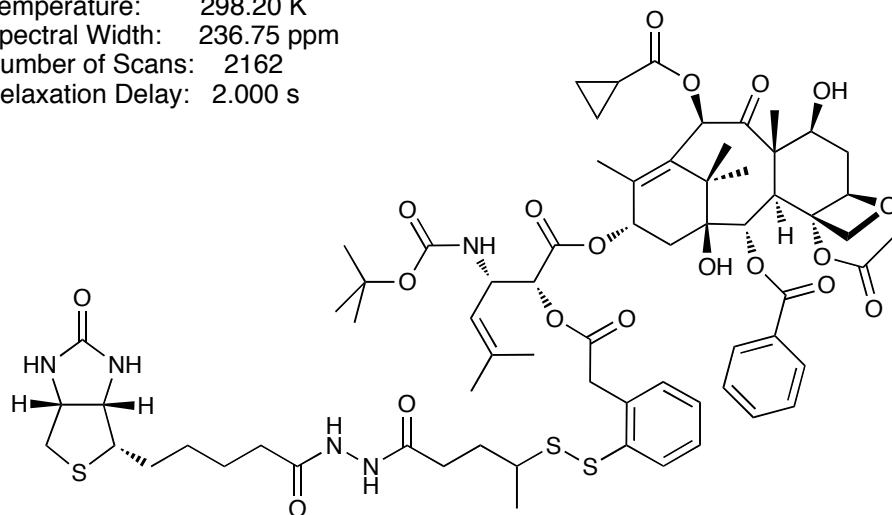

*Compound 4*

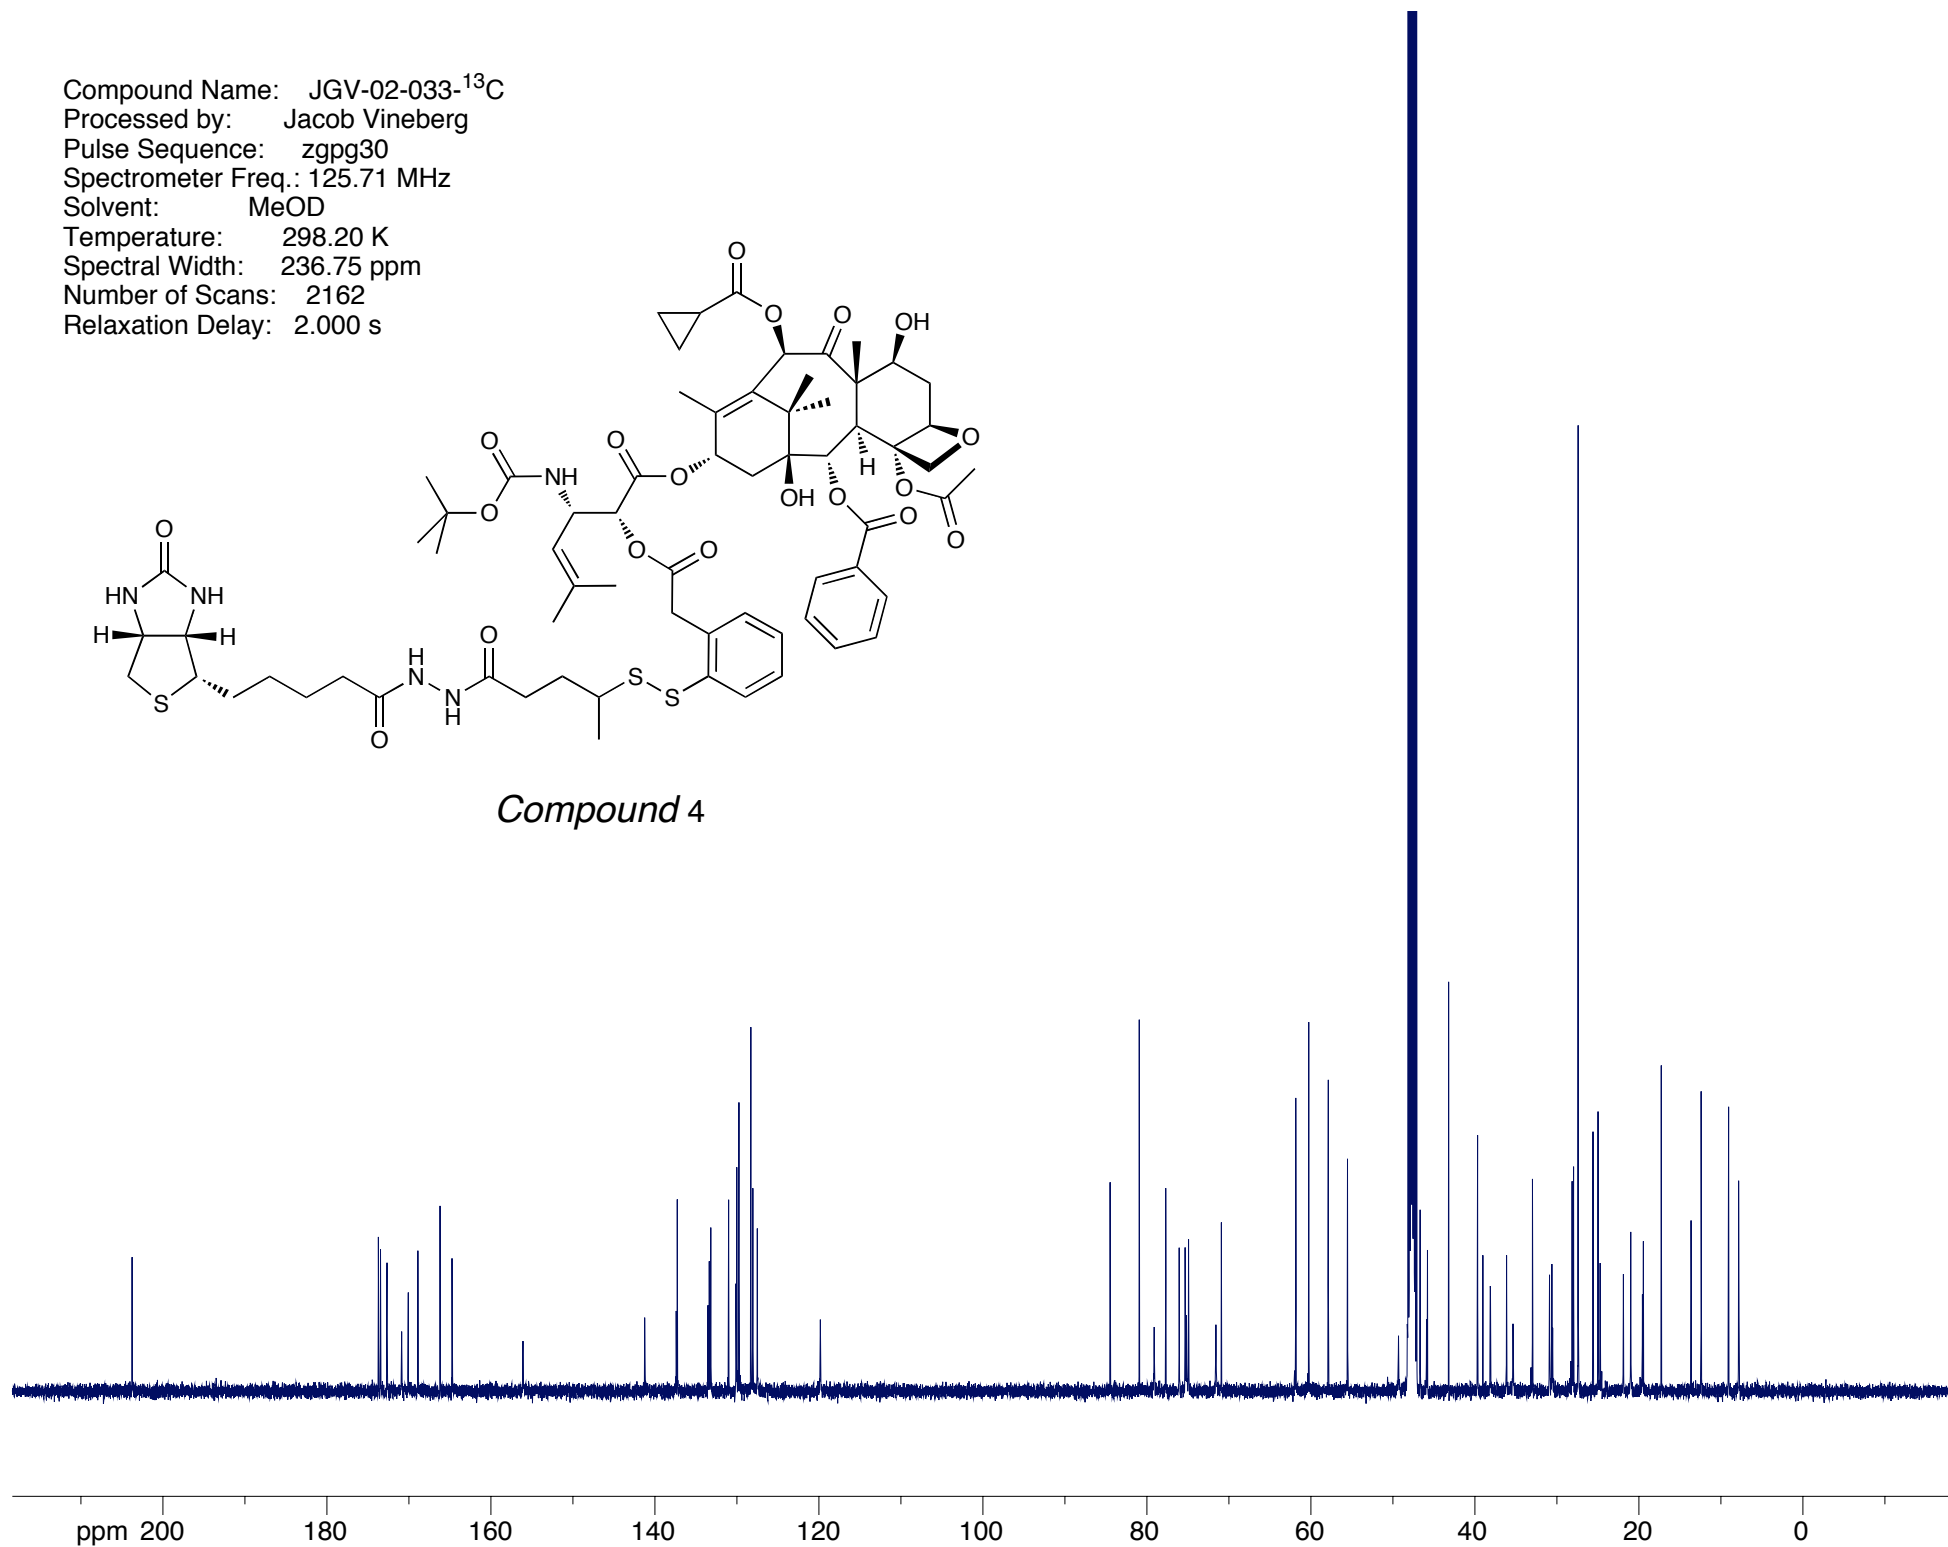

Supplement: NIHMS661758-supplement.pdf [file NIHMS661758-supplement.pdf]
